# 1 **Knowledge Gaps of STIs in Africa; Systematic review**

2 Badawi, M M<sup>1,\*</sup>, Salah-Eldin, M A<sup>2</sup>, Idris, A B<sup>3</sup>, Hasabo, E A<sup>4</sup>, Osman, Z H<sup>5</sup> and Osman, W M<sup>6</sup>

3 <sup>1</sup> Medical unit, Higher Academy for Strategic and Security Studies, Alamal Hospital, Khartoum, Sudan.

4 <sup>2</sup> Medical Microbiology department, Faculty of Medical Laboratory Sciences, University of Khartoum,  
5 Khartoum, Sudan

6 <sup>3</sup> Faculty of Medicine, University of Bahri, Khartoum, Sudan

7 <sup>4</sup> Faculty of Medicine, University of Khartoum, Khartoum, Sudan

8 <sup>5</sup> Faculty of Medical Laboratory Sciences, Sudan International University, Khartoum, Sudan

9 <sup>6</sup> Faculty of Medicine, National Ribat University, Khartoum, Sudan

10  
11 \*Corresponding author: [mmbadwi44new@gmail.com](mailto:mmbadwi44new@gmail.com)

12  
13

14

15

16

17

18

19

20

21

22

23

24

25

26

27

28

## 29 **Abstract**

30 Sexually Transmitted Infections (STIs) are ambiguous burden of tremendous health, social and  
31 economic consequences, The current systematic review was conducted in order to determine  
32 awareness and knowledge of Africans of sexually transmitted infections, not only concerning  
33 HIV/AIDS, but also other STIs such as, gonorrhea, syphilis, HBV, HCV and HPV. A systematic  
34 review of the literature was conducted, studies were retrieved and selected after they fulfilled the  
35 inclusion criteria and passed the assessment procedure. related data was extracted, quantitative  
36 analysis was conducted among participants who responded to questions related to HIV, HBV, HCV,  
37 HPV or STIs knowledge, sensitivity analysis as well as subgroup analysis were also conducted.  
38 Seventy four articles addressing knowledge among 35 African countries were included and 136  
39 questions were analyzed and synthesized. The question "Using condom will reduce HIV  
40 transmission?" was answered by 1,799,374 Africans in 35 countries, 66.82% [95% CI; 62.65, 70.98]  
41 answered yes. While the question "Is sexual contact a possible route of HBV transmission?" was  
42 answered by 7,490 participants in 5 countries; 42.58% [95% CI; 20.45, 64.71] answered yes. The  
43 differences observed among populations are highlighting the possibility for containment and control  
44 by directing light toward specific populations or countries as well as addressing specific awareness  
45 knowledge to ensure that the general as well as the related specific preventive awareness knowledge  
46 is improved.

## 47 **Keywords**

48 Africa, Awareness, Developing countries, Knowledge, STIs, sub-Saharan Africa, Viral infections.

## 49 **Introduction**

50 Sexually transmitted Infections (STIs) are ambiguous burden of tremendous health, social and  
51 economic consequences. Most of them are hidden because many people may feel stigmatized when  
52 addressing them. Moreover, the committee on prevention and control of sexually transmitted diseases  
53 in USA estimated that the annual costs of selected major STDs are approximately \$10 billion or, if  
54 sexually transmitted HIV is included, \$17 billion <sup>[1]</sup>.

55 According to UNAIDS; almost 37 million people globally were living with HIV in 2017, sub-Saharan  
56 Africa accounted for 66% of the cases, 68% of new adult HIV infections, 92% of new infections in  
57 children and 72% of all AIDS-related deaths. Earlier in 2009, Swaziland topped the world's HIV

58 epidemic countries with a 26% prevalence among adults, while South Africa was the country with the  
59 world's largest prevalence of people living with HIV as 5.6 million [2,3].

60 On the other hand and according to WHO; an estimated 257 million people are living with HBV  
61 infection with the highest prevalence in the Western Pacific Region and the African Region as 6.2%  
62 and 6.1% of the adult population are infected, respectively. About 1% of persons living with HBV  
63 infection (2.7 million people) are also infected with HIV. Moreover, approximately 399,000 people  
64 die each year from hepatitis C infection and the estimated global HPV prevalence is 11.7% with the  
65 Sub-Saharan Africa having the largest burden as well (24.0%), [4-6].

66 Africa is considered the continent with the lowest Gross Domestic Product (GDP) as most African  
67 countries fall within the lower-middle to low income countries classification. Moreover, In March  
68 2013, despite of the predicted uprising in African economy in the following decades, Africa was  
69 identified as the world's poorest inhabited continent; Africa's entire combined GDP is estimated to be  
70 barely a third of the United States', this could be straightforwardly influencing screening opportunities,  
71 medical consultations as well as treatment options. Taking that under consideration; a strategy of STIs  
72 containment in Africa should primarily emphasize prevention and its related knowledge. Chan and  
73 Tsai in their study represented awareness outcome of data collected from 33 sub-Saharan African  
74 countries. Although their study determined the estimated awareness according to data collected from  
75 2003 to 2015 as well as a knowledge trend among each participated country was illustrated, awareness  
76 of five questions were assessed regarding HIV only. The current systematic review was conducted in  
77 order to determine awareness and knowledge of Africans of sexually transmitted infections, not only  
78 concerning HIV/AIDS, but also other STIs such as, gonorrhea, syphilis, HBV, HCV and HPV and  
79 concerning all awareness determinants that are reported in the literature [7,8].

## 80 **Materials and methods**

### 81 **Search strategy**

82 To identify relevant studies, a systematic review of the literature was conducted in the 1<sup>st</sup> of December  
83 2018. The review was conducted in accordance with the PRISMA (Preferred Reporting Items for  
84 Systematic Reviews and Meta-Analyses) Statement [8] (Table S1). A comprehensive search was  
85 conducted in PubMed, Embase, Google scholar, Scopus, Index Copernicus, DOAJ, EBSCO-CINAHL,  
86 Cochrane databases without language limits (studies written in French were later excluded). To obtain  
87 a current situation evidence; only studies published in or after 2010 were included. Furthermore, all  
88 studies where the data collection process took place before 2010 were also excluded, the only

89 exception was if the collection process continued months/years earlier than 2010 and ended in 2010 or  
90 afterwards. The keywords used in PubMed was as follow:

91 ((HIV[Tiab] OR syphilis[Tiab] OR gonorrhea[Tiab] OR sexual behavior[Tiab] OR "men who have sex with  
92 men"[Tiab] OR condom[Tiab] OR "herpes simplex virus"[Tiab] OR "sex workers"[Tiab] OR sex [tiab]OR  
93 human immunodeficiency virus[Tiab] OR HBV[Tiab] OR HCV[Tiab] OR HPV[Tiab] OR prostitutes[Tiab] OR  
94 trichomonas vaginalis[Tiab]) AND (behavior [Ti] OR risk [ti] OR awareness[Ti] OR knowledge[Ti] OR  
95 assessment[Ti]) AND (africa[Tiab] OR algeria[Tiab] OR angola[Tiab] OR benin[Tiab] OR botswana[Tiab] OR  
96 burkinafaso[Tiab] OR burundi[Tiab] OR caboverde[Tiab] OR cameroon[Tiab] OR central african  
97 republic[Tiab] OR CAR[Tiab] OR chad[Tiab] OR comoros[Tiab] OR "democratic republic of the congo"[Tiab]  
98 OR "republic of the congo"[Tiab] OR cote d'ivoire[Tiab] OR djibouti[Tiab] OR egypt[Tiab] OR equatorial  
99 guinea[Tiab] OR eritrea[Tiab] OR eswatini[Tiab] OR swaziland[Tiab] OR ethiopia[Tiab] OR gabon[Tiab] OR  
100 gambia[Tiab] OR ghana[Tiab] OR guinea[Tiab] OR guinea-bissau[Tiab] OR kenya[Tiab] OR lesotho[Tiab] OR  
101 liberia[Tiab] OR libya[Tiab] OR madagascar[Tiab] OR malawi[Tiab] OR mali[Tiab] OR mauritania[Tiab] OR  
102 mauritius[Tiab] OR morocco[Tiab] OR mozambique[Tiab] OR namibia[Tiab] OR niger[Tiab] OR  
103 nigeria[Tiab] OR rwanda[Tiab] OR (sao tome principe[Tiab] OR senegal[Tiab] OR seychelles[Tiab] OR sierra  
104 leone[Tiab] OR somalia[Tiab] OR south africa[Tiab] OR south sudan[Tiab] OR sudan[Tiab] OR  
105 swaziland[Tiab] OR eswatini[Tiab] OR tanzania[Tiab] OR togo[Tiab] OR tunisia[Tiab] OR uganda[Tiab] OR  
106 zambia[Tiab] OR zimbabwe[Tiab])).

107 Moreover, to optimize our search, hand searches of reference lists of included articles were also  
108 performed.

### 109 **Study selection and data extraction**

110 All authors independently assessed titles and abstracts for eligibility, and any disagreement was  
111 resolved through discussion. A copy of the full text was obtained for all research articles that were  
112 available and approved in principle to be included. Abstraction of data was in accordance with the task  
113 separation method; method and result sections in each study were separately abstracted in different  
114 occasions to reduce bias <sup>[9]</sup>. Moreover, data abstraction was conducted with no consideration of  
115 author's qualifications or expertise. Studies assessed the knowledge of parasitic infections as well as  
116 studies conducted among healthcare workers (clinicians, laboratory specialists, nurses, dentists and  
117 midwives) were excluded. If a data regarding the period of conduction is missing in a study the  
118 reference list was crossed, if any cited study is published after 2010 authors of the current review  
119 agreed to predict that the study is conducted after 2010 and hence it was considered for inclusion and  
120 it was considered to be addressed later in the review as (conducted after 2010), otherwise the study  
121 was excluded. All studies measuring awareness level with scores or if it is generally good or moderate  
122 or bad without determining further details were excluded. Each research article was screened for all

123 relevant information and recorded in the data extraction file (Microsoft Excel), as one article may  
124 report outcome of awareness and/or knowledge and/or attitude toward specific sexually transmitted  
125 infection or toward several STIs, in a single population or among several ones. Moreover, data from  
126 each method section was extracted using a predefined set of variables; study characteristics, type of  
127 participants, study population size, geographical region and the period of the study conduction.

### 128 **Assessment of quality**

129 Each included article was evaluated based on a framework for making a summary assessment of the  
130 quality. The related published literature was crossed, then a framework was structured specifically to  
131 determine the level of representativeness of the studied population and to judge the strength of the  
132 estimates provided. Six questions were to be answered in each article, each answer represent either 1  
133 score for yes, 0 score for No or 0 score for not available ; A total score for risk of bias and quality was  
134 calculated by adding up the scores in all six domains, resulting in a score of between 0 and 6. The  
135 highest score indicates the highest quality, studies with a score for quality greater or equal to 3 (higher  
136 quality) were included in the review.

137 The six domains were: is the study objective clearly defined?, is the study sample completely  
138 determined?, is the study population clearly defined and specified?, is the response rate of participants  
139 above 70%?, is the methodology used rigorous? and is the data analysis rigorous?

140 Trim and Fill method was used to assess the risk of publication bias in each question responses in the  
141 included studies <sup>[10]</sup>. Publication bias was assessed separately for each question-corresponding  
142 responses only if the question was addressed and answered in studies equal or greater than ten.

### 143 **Quantitative analysis**

144 Meta-analysis was performed - whenever possible using Review Manager Software (Version 5.3). In  
145 studies where the Standard Error (SE) is not reported, the following formula was used to calculate it:  
146  $SE = \sqrt{p(1-p)/n}$  where p stands for Prevalence. The software automatically provided the Confidence  
147 Interval (CI) according to the calculated SE, if the CI is provided in a study; it was introduced  
148 accordingly. The heterogeneity of each meta-analysis was assessed, the random effects was favored  
149 over the fixed effects model in all meta-analysis established as differences between studies is  
150 predicted to be possible due to the diversity of the study populations. Sensitivity analysis was also  
151 approached to determine the effect of studies conducted in populations proposed to behave in  
152 indifference manners or proposed to be more aware on the overall pooled prevalence. Moreover,  
153 subgroup analysis was also conducted -whenever suitable to determine awareness level in specific

154 country or population. A question to take part in the meta-analysis has to be included in at least two  
 155 studies. Moreover, for providing the full picture as well as emphasizing potential research gaps; all  
 156 HIV-related questions that are proposed to be of interest according to the objective of the current  
 157 review and was answered by at least 1,000 Africans but included only in one study were also provided  
 158 alongside their related references, however, questions related to other STIs were provided regardless  
 159 of the number of participants due to their minority. Questions with similar outcome were proposed to  
 160 be the same (i.e. the question "do you think sexual intercourse will increase the risk of HIV  
 161 transmission?" and the question "is HIV sexually transmitted?" were considered as one question.

## 162 Results

### 163 Studies included

164 A total of 7,540 articles were identified from the search strategy including hand searches of reference  
 165 lists of included original research articles and reviews. From these, 7,453 articles were excluded.  
 166 Seventy four articles met our inclusion criteria and passed the quality assessment procedure. The  
 167 articles reported specific awareness determinants and/or knowledge and/or attitudes of an African  
 168 population regarding STIs as general and/or HBV and/or HCV and/or HPV and/or HIV. (Fig. 1)  
 169 illustrates the PRISMA flow diagram. The included articles are depicted in (Table 1). Assessment of  
 170 the quality of included studies is depicted in (Table S2).

171

172 **Fig (1):** Literature search and selection of studies (PRISMA flow diagram).

173

174 **Table (1):** Characteristics of included studies

| Study                            | Year of publication | Year/s of conduction | City/Region/Country                     | study population/s | Assessment of knowledge of | sample size | Gender | Participants' Age |
|----------------------------------|---------------------|----------------------|-----------------------------------------|--------------------|----------------------------|-------------|--------|-------------------|
| lulai <i>et al</i> (12)          | 2016                | 2010                 | Kintampo North/Brong Ahafo Region/Ghana | Pregnant women     | HBV                        | 504         | Female | 26±6              |
| Abimanyi-Ochom <i>et al</i> (13) | 2017                | 2011                 | Uganda                                  | General population | HIV                        | 10,969      | Both   | 15-49             |
| Aderemi <i>et al</i> (14)        | 2013                | After 2010           | Oyo State/Nigeria                       | Students           | HIV                        | 600         | Both   | 12-19             |
| Adoba <i>et al</i> (15)          | 2015                | 2015                 | Obuasi/Ghana                            | Barbers            | HBV/HCV                    | 200         | Male   | 20-29             |
| Ajide and Balogun (16)           | 2018                | After 2010           | Ibadan/Nigeria                          | Students           | HIV                        | 240         | Both   | 16±1              |
| Akokuwebe <i>et al</i> (17)      | 2016                | After 2010           | Ikeji-Arakeji/Osun/Nigeria              | Adolescents        | HIV/STIs                   | 341         | Both   | 16+2              |
| Amu and Adegun (18)              | 2015                | After 2010           | Ado Ekiti/Nigeria                       | Students           | HIV/STIs                   | 540         | Both   | 10-14             |
| Appiah-Agyekum <i>et al</i> (19) | 2013                | After 2010           | Accra/Ghana                             | Students           | HIV                        | 260         | Female | 16- ≥19           |
| Aroke <i>et al</i> (20)          | 2018                | 2016                 | Centre Region, North Region and South   | Medical students   | HBV                        | 714         | Both   | 22±1              |

|                               |      |            | Region/Cameroon                                                          |                                                  |                 |           |             |             |
|-------------------------------|------|------------|--------------------------------------------------------------------------|--------------------------------------------------|-----------------|-----------|-------------|-------------|
| <b>Asefa and Beyene (21)</b>  | 2013 | 2012       | Southern Nations, Nationalities, and Peoples' Region/ Ethiopia           | Pregnant women                                   | HIV             | 1,325     | Female      | 15-49       |
| <b>Audet et al(22)</b>        | 2012 | After 2010 | Zambe'zia/Mozambique                                                     | General population                               | HIV             | 349       | Both        | Median 32   |
| <b>Azodo et al(23)</b>        | 2014 | 2010       | Enugu/Nigeria                                                            | Dental tech students                             | HIV             | 198       | Both        | 20- ≥27     |
| <b>Becker et al(24)</b>       | 2015 | 2009-2010  | Durban/KwaZulu-Natal/South Africa                                        | General population                               | HIV             | 2,477     | Both        | N.A         |
| <b>Carlos et al(25)</b>       | 2015 | 2010       | Kinshasa/ Democratic Republic of Congo                                   | Outpatients and blood donors                     | HIV             | 1,614     | Both        | 15-49       |
| <b>Chan and Tsai(8)</b>       | 2018 | 2003-2015  | 33 Countries                                                             | General population                               | HIV             | 1,187,077 | Both        | N.A         |
| <b>Chaquisse et al (26)</b>   | 2018 | 2013-2014  | Nampula/Mozambique                                                       | Pregnant women                                   | HIV/HBV/HCV     | 1,186     | Female      | median 22   |
| <b>Chard et al (27)</b>       | 2017 | After 2010 | South Africa                                                             | men who indicated an interest in men             | HIV             | 386       | Male        | mean 33     |
| <b>Cheng et al (28)</b>       | 2015 | 2013-2014  | Kumasi/Ghana                                                             | pregnant women                                   | HBV             | 209       | Female      | N.A         |
| <b>Chimoyi et al (29)</b>     | 2015 | 2013       | Gohannesburg/Gauteng/ South africa                                       | General population                               | HIV             | 1146      | Both        | N.A         |
| <b>Ciampa et al (30)</b>      | 2012 | 2011       | Zambezia/Mozambique                                                      | prenatal care in women                           | HIV             | 348       | Female      | median 24   |
| <b>Darteh et al (31)</b>      | 2016 | 2011       | Kwesimintsim Zongo/Ghana                                                 | adolescents, general population                  | HIV             | 902       | Both        | mean 14     |
| <b>Demsiss et al (32)</b>     | 2018 | 2017       | South Wollo Zone/Amhara/Ethiopia                                         | medicine and health science students             | HBV/HCV         | 408       | Both        | mean 26 ± 4 |
| <b>Elbadawi et al (33)</b>    | 2016 | 2016       | Khartoum/Sudan                                                           | university students                              | HIV             | 556       | Both        | N.A         |
| <b>Engelbrecht et al (34)</b> | 2017 | 2012       | Moretele Sub-district/Bojanala District/North West province/South Africa | home-based carers                                | HIV             | 144       | Both        | median 35   |
| <b>Eni et al (35)</b>         | 2018 | 2016       | Lagos, Ogun and Abia/Nigeria                                             | University students, general population          | HPV             | 758       | Both        | 16–39       |
| <b>Ezenwa et al (36)</b>      | 2013 | 2012       | Shomolu Local Government Area/Lagos/Nigeria                              | mothers of female adolescents                    | HPV             | 290       | Female      | 24–62       |
| <b>Faleye et al (37)</b>      | 2014 | 2012-2013  | Durban/KwaZulu-Natal/South africa                                        | Male medical circumcision clients                | HIV             | 394       | Male        | mean 28±9   |
| <b>Faust et al (38)</b>       | 2017 | 2013       | Nigeria                                                                  | general population                               | HIV             | 56,307    | Both        | 15–49       |
| <b>Faye et al (39)</b>        | 2013 | May, 2010  | Senegal                                                                  | seafarers                                        | HIV             | 400       | Male        | 38 ±10      |
| <b>Frambo et al (40)</b>      | 2014 | 2012       | Buea Health District/Cameroon                                            | pregnant women                                   | HBV             | 176       | Female      | 17-42       |
| <b>Funmilayo et al (41)</b>   | 2018 | 2014       | Lagos/Nigeria                                                            | university students                              | HPV             | 280       | Both        | 15-40       |
| <b>George et al (42)</b>      | 2013 | 2010       | Northern Cape province/South Africa                                      | rural based traditional healers                  | HIV             | 186       | Both        | N.A         |
| <b>Griffith et al (43)</b>    | 2015 | 2013       | Masiphumelele/Cape Town/South Africa                                     | HIV-Infected and HIV-Uninfected Adolescent Women | HPV             | 30        | Female      | 16-21       |
| <b>Joda et al (44)</b>        | 2013 | After 2010 | Lagos/Nigeria                                                            | students                                         | Gonorrhoea/STIs | 30        | Both        | 15-35       |
| <b>Kiderlen et al (45)</b>    | 2015 | 2011       | Namibia                                                                  | employees in truck transport sector              | HIV             | 483       | Both        | ≤19-≥60     |
| <b>Kufa et al (46)</b>        | 2018 | After 2010 | Eastern Cape,Western Cape,Free State,Gauteng/South Africa                | STI service attendees                            | HIV             | 1,054     | Both        | 23-32       |
| <b>Laraqui et al (47)</b>     | 2017 | 2014       | Morocco                                                                  | seafarers                                        | STI,HIV         | 1447      | Male        | 36±8        |
| <b>Lawan et al(48)</b>        | 2012 | 2011       | Kano/Nigeria                                                             | FSW                                              | HIV             | 124       | Female<br>s | 26±2        |
| <b>Makwe et al(49)</b>        | 2012 | 2010       | Lagos/Nigeria                                                            | students                                         | HPV             | 368       | Female<br>s | 16-29       |
| <b>Mason et al(50)</b>        | 2013 | after 2010 | Gambia                                                                   | Men Who Have Sex with Men                        | HIV             | 207       | Males       | ≥16         |
| <b>Massey et al (51)</b>      | 2017 | 2014       | Dakar, Thies, Fatick, Mbour and Ziguinchor/Senegal                       | Adolescents and young adults                     | HPV             | 2,286     | Both        | 14-22       |
| <b>Mesfin et al (52)</b>      | 2013 | 2013       | Harar town/Harari/Ethiopia                                               | Students                                         | HBV             | 322       | Both        | 20-24       |
| <b>Mkumbo et al (53)</b>      | 2013 | after 2011 | Dar es Salaam, Morogoro and Tanga/Tanzania                               | Students                                         | HIV             | 362       | Both        | Mean 25     |
| <b>Mouallif et al (54)</b>    | 2014 | 2012       | Casablanca, Marrakech, Chaouiya-Ouardiguaaand Tangier/Morocco            | parents                                          | HPV             | 852       | Both        | 19-67       |
| <b>Nabukenya et al (55)</b>   | 2018 | 2011       | Uganda                                                                   | older adults                                     | HIV             | 2,472     | Both        | 45-59       |

|                                  |      |            |                                                     |                                               |                      |        |         |           |
|----------------------------------|------|------------|-----------------------------------------------------|-----------------------------------------------|----------------------|--------|---------|-----------|
| <b>Nawagi et al (56)</b>         | 2016 | 2013       | Katanga slum/Kampala/Uganda                         | women of reproductive age                     | STI                  | 335    | Females | 18-45     |
| <b>Ngaira et al (57)</b>         | 2016 | 2014       | Mbagathi/Nairobi/Kenya                              | pregnant women                                | HBV                  | 287    | Females | 15-49     |
| <b>Noubiap et al (58)</b>        | 2013 | 2012       | Yaoundé/Cameroon                                    | medical students                              | HBV                  | 111    | Both    | 20-27     |
| <b>Nubed et al(59)</b>           | 2016 | 2014       | Fako/South West Region/Cameroon                     | senior secondary school students              | HIV                  | 464    | Both    | 13-25     |
| <b>Ojieabu et al (60)</b>        | 2011 | 2011       | Sagamu/Ogun/Nigeria                                 | Pregnant Women                                | HIV                  | 403    | Females | 20- ≥40   |
| <b>Okonkwo et al (61)</b>        | 2017 | 2014       | Nigeria                                             | Traders                                       | HBV                  | 335    | Both    | median 29 |
| <b>Okonkwo et al (62)</b>        | 2018 | 2015       | Cross River State/Nigeria                           | general population                            | HBV                  | 1,620  | Both    | 18- ≥18   |
| <b>Oladepo and Fayemi (63)</b>   | 2011 | 2010       | Ibadan South-West Local Government Area/Oyo/Nigeria | Secondary students                            | HIV                  | 420    | Both    | 10-19     |
| <b>Omotowo et al (64)</b>        | 2018 | 2016       | Enugu/Nigeria                                       | Administration staff of a hospital            | HBV                  | 3,132  | Both    | 18-75     |
| <b>Oppong and Oti-Boadi (65)</b> | 2013 | N/A        | Accra/Ghana                                         | undergraduate private university students     | HIV                  | 324    | Both    | 17-37     |
| <b>Owusu (66)</b>                | 2015 | After 2010 | Cape Coast Metropolis/Ghana                         | primary school children                       | HIV                  | 120    | Both    | 9-13      |
| <b>Oyekale (67)</b>              | 2014 | 2012       | All regions of Cameroon                             | men of reproductive age                       | HIV                  | 7,191  | Male    | 15-49     |
| <b>Paintsil et al (68)</b>       | 2015 | 2013/2014  | Accra and Ashanti/Ghana                             | pediatric caregivers                          | HIV                  | 298    | Both    | 32-53     |
| <b>Pathmanathan et al (69)</b>   | 2016 | N/A        | Malawi                                              | General population                            | HIV                  | 3,630  | Both    | 15-49     |
| <b>Poole et al(70)</b>           | 2013 | 2011       | Bamako/ Mali                                        | adults and adolescents in Mali                | HPV                  | 51     | Both    | 12-26     |
| <b>Reuter et al (71)</b>         | 2018 | 2013       | Antsiranana/Madagascar                              | university students                           | HIV/HBV/HCV/HPV/STIs | 242    | Both    | 23±3      |
| <b>Rukundo et al (72)</b>        | 2016 | 2014       | Kampala and Buikwe districts/Uganda                 | school students                               | HIV                  | 245    | Both    | 10-19     |
| <b>Sahile et al (73)</b>         | 2015 | 2014       | Ambo/Oromia/Ethiopia                                | university students                           | HIV                  | 1,311  | Both    | 18-30     |
| <b>Saleh et al (74)</b>          | 2014 | 2011       | Menoufia and Giza governorates/Egypt                | residents                                     | HCV                  | 67     | Both    | 18-80     |
| <b>Sandqvist et al (75)</b>      | 2011 | 2010       | Mateete/Central Region/Uganda                       | pregnant women                                | HIV                  | 120    | Females | 15-46     |
| <b>Schwitters et al (76)</b>     | 2015 | 2011-2013  | Katutura/Namibia                                    | young HIV-negative men                        | HIV                  | 501    | Male    | <18       |
| <b>Seyoum and Legesse (77)</b>   | 2013 | 2011       | Harar town/Harari/Ethiopia                          | TB patients                                   | HIV                  | 415    | Both    | 16-60     |
| <b>Shiferaw et al (78)</b>       | 2014 | After 2010 | Gondar/Amhara/Ethiopia                              | university students                           | HIV                  | 384    | Both    | 19-26     |
| <b>Sultan et al(79)</b>          | 2018 | 2014       | Cairo/Egypt                                         | HCV patients                                  | HCV                  | 203    | Both    | ≥18       |
| <b>Tarekegne et al(80)</b>       | 2018 | 2017       | Sokota/Ethiopia                                     | workers in an engineering Company             | HIV                  | 55     | Both    | ≥15       |
| <b>Umar and Oche (81)</b>        | 2012 | 2010       | Sokoto/Nigeria                                      | religious leaders                             | HIV                  | 158    | Male    | ≥30       |
| <b>Wagenaar et al(82)</b>        | 2012 | 2010       | South Africa                                        | Men Who Have Sex with Men                     | HIV                  | 1593   | Male    | ≥18       |
| <b>Yaya et al(83)</b>            | 2018 | 2013       | Nigeria                                             | community dwelling women                      | HIV                  | 38,948 | Females | 15-49     |
| <b>Zungu et al(84)</b>           | 2016 | 2012       | South Africa                                        | medically and traditionally circumcised males | HIV                  | 11,086 | Male    | ≥15       |

175

## 176 Study characteristics

177 The characteristics of the included studies are depicted in (Table1), among which the oldest were  
 178 published in 2010 while the most recent ones were published in 2018. Fifty one research articles  
 179 determining HIV awareness level and/or knowledge and/or attitudes were included, while 14 articles  
 180 determining HBV awareness level and/or knowledge and/or attitudes were included. Furthermore, 6  
 181 and 9 articles concerned of awareness level and/or knowledge and/or attitudes level regarding HCV



182 and HPV were included, respectively. Seven articles determining STIs awareness level and/or  
183 knowledge and/or attitudes as general were also included. Two hundred questions were summarized  
184 among which 136 questions were analyzed and synthesized from included studies including the  
185 subgroup analysis. Publication bias assessment indicated no major asymmetry (data not shown).

## 186 **Human Immunodeficiency Virus (HIV)**

187 Fifty one included studies assessed the awareness of 1,235,811 Africans in regard to HIV in total of 35  
188 countries, eleven studies were conducted in Nigeria [14,16,83,17,18,23,38,48,60,63,81], nine in South Africa  
189 [24,27,29,34,37,42,46,82,84], five in each of Ghana [19,31,65,66,68] and Ethiopia [21,73,77,78,80], four in Uganda  
190 [13,55,72,75], three in Mozambique [22,26,30], two in each of Namibia [45,76] and Cameroon [59,67], one in each  
191 of Congo [25], Sudan [33], Senegal [39], Morocco [47], Gambia [50], Tanzania [53], Madagascar [71] and  
192 Egypt [74] while a study provided awareness prevalence in 33 countries [8]. The conduction of the  
193 studies ranged from 2010 to 2017. Population under study was distributed among students and  
194 adolescents, general population, pregnant women, female sex workers, male sex workers or males  
195 who show interest of males, TB patients, seafarers and other occupations (Table 1). Majority of  
196 studies were conducted among both genders (34/51), eight studies were toward females only while  
197 nine were toward males only. Age of respondents ranged from 10 to 60 years (Table 1). Forty two  
198 questions were asked to the participants that are related to the knowledge and awareness of HIV as  
199 general, transmission routes, clinical symptoms, pathological consequences and prevention attitude,  
200 among which 31 questions were analyzed and synthesized. The question " Using condom will reduce  
201 HIV transmission?" was answered by 1,799,374 Africans in Benin, Burkina Faso, Burundi, Cameroon,  
202 Chad, Comoros, Cote d'Ivoire, Democratic Republic of Congo, Ethiopia, Gabon, Ghana, Guinea,  
203 Kenya, Lesotho, Liberia, Madagascar, Malawi, Mali, Morocco, Mozambique, Namibia, Niger,  
204 Nigeria, Rwanda, São Tomé and Príncipe, Senegal, Sierra Leone, South Africa, Sudan, Swaziland,  
205 Tanzania, Togo, Uganda, Zambia and Zimbabwe; 66.82% [95% CI; 62.65, 70.98] answered yes. The  
206 question " Is HIV contracted through Sexual intercourse?" was answered by 252,482 participants in  
207 South Africa, Ethiopia, Uganda, Madagascar, Ghana, Nigeria, Gambia, Morocco, Namibia, Senegal,  
208 Sudan and Mozambique; 72.20% [95% CI; 64.25, 80.16] answered yes. Questions asked, their  
209 corresponding articles' data, the pooled prevalence, the pooled prevalence after conducting sensitivity  
210 analysis and the confidence intervals are depicted in (Table 2 & Fig 2). Heterogeneity was high in all  
211 questions ( $I^2$  more than 80%), except for the question " Is TB associated with HIV infection?" where  $I^2$   
212 = 0%.

213

214 **Table (2):** Awareness of HIV-related knowledge among Africans

| Question                                             | Country/ies*                                                                                                                                | Study population/s                                                                                                                                                                                                                                                                                    | Total sample size | References                                              | Pooled prevalence of yes response [95% CI] | Sensitivity analysis ** |
|------------------------------------------------------|---------------------------------------------------------------------------------------------------------------------------------------------|-------------------------------------------------------------------------------------------------------------------------------------------------------------------------------------------------------------------------------------------------------------------------------------------------------|-------------------|---------------------------------------------------------|--------------------------------------------|-------------------------|
| Have you heard about HIV before?                     | NI, SD, CR, UG, EG, ET,                                                                                                                     | students, general population, pregnant Women, men of reproductive age, newly married couples without formal education, TB patients, workers                                                                                                                                                           | 65,562            | [16,33,38,60,67,72,74,77,80]                            | 92.24 [89.68, 94.80]                       | 94.42 [91.82, 97.02]    |
| Can a healthy person be HIV infected?                | SD, BE, BF, BR, CR, CH, Comoros, DC, IC, DC, ET, GB, GH, GU, KY, LE, LI MD, MW, ML, MZ, NM, NG, NI, RW, RS, SN, SL, SW, TA, TO, UG, ZM, ZI, | community dwelling women, MSM, pediatric caregivers, men of reproductive age, Students, employees in truck transport sector, pregnant women, Outpatients and blood donors, General population                                                                                                         | 1,306,715         | (8,13,67,68,72,82,83,19,25,30,33,38,45,53,59)           | 69.67 [66.65, 72.70]                       | 70.99 [67.95, 74.02]    |
| Do you perceive risk of contracting HIV?             | SA, NM, GH, NI.                                                                                                                             | students, men who indicated an interest in men, adolescents, general population, medically and traditionally circumcised males                                                                                                                                                                        | 13,073            | (23,27,31,76,84)                                        | 39.27 [-5.31, 83.84]                       | 36.97 [13.93, 60.02]    |
| Is it possible to cure HIV?                          | NI, MZ, SA, TA, CR, UG                                                                                                                      | Students, Traditional healers, pregnant women, General population                                                                                                                                                                                                                                     | 813,382           | (16,22,30,42,53,59,72)                                  | 41.91 [18.72, 65.10]                       | 39.97 [22.48, 57.45]    |
| Do you know a place to get HIV testing?              | NI, GH                                                                                                                                      | students, general population                                                                                                                                                                                                                                                                          | 56,631            | (38,65)                                                 | 85.76 [59.79, 111.73]                      |                         |
| Is social stigma barrier to HIV testing?             | SA                                                                                                                                          | General population                                                                                                                                                                                                                                                                                    | 1,146             | (29)                                                    | 37.4 [34.6561, 40.14]                      |                         |
| Is ignorance causes stigma to HIV testing?           | SA                                                                                                                                          | General population                                                                                                                                                                                                                                                                                    | 1,146             | (29)                                                    | 46.3 [43.5561, 49.04]                      |                         |
| Is HIV transmission possible through mosquito bites? | SD, BE, BF, BR, CR, CH, Comoros, DC, IC, DC, ET, GB, GH, GU, KY, LE, LI MD, MW, ML, MZ, NM, NG, NI, RW, RS, SN, SL, SW, TA, TO, UG, ZM, ZI, | community dwelling women, pregnant women, men of reproductive age, Students, seafarers, employees in truck transport sector, Outpatients and blood donors, General population                                                                                                                         | 2,492,259         | (8,13,23,25,26,33,38,45,47,53,59,60,66,67,75,83)        | 32.22 [18.74, 45.70]                       | 32.80 [18.96, 46.64]    |
| Is HIV transmission possible through sharing food?   | SD, BE, BF, BR, CR, CH, Comoros, DC, IC, DC, ET, GB, GH, GU, KY, LE, LI MD, MW, ML, MZ, NM, NG, NI, RW, RS, SN, SL, SW, TA, TO, UG, ZM, ZI, | community dwelling women, men of reproductive age, Students, employees in truck transport sector, seafarers, general population                                                                                                                                                                       | 1,302,877         | (8,13,33,38,39,45,53,59,66,67,83)                       | 27.33 [2.67, 51.99]                        | 26.49 [-0.76, 53.73]    |
| Is HIV transmission possible during pregnancy?       | UG, NI, ET, MZ, SA, SN, NM, MR, TA, GH, EG,                                                                                                 | community dwelling women, MSM, workers, pregnant women, newly married couples without formal education, pediatric caregivers, undergraduate university students, General population, Students, pregnant women, clients presenting for Male medical circumcision, employees in truck transport sector, | 115,604           | (13,14,16,21,26,37-39,45,47,53,60,65,68,74,75,80,82,83) | 57.08 [52.42, 61.74]                       | 57.62 [53.17, 62.07]    |

|                                                                          |                                                 |                                                                                                                                                                                                           |         |                                                                     |                        |                      |
|--------------------------------------------------------------------------|-------------------------------------------------|-----------------------------------------------------------------------------------------------------------------------------------------------------------------------------------------------------------|---------|---------------------------------------------------------------------|------------------------|----------------------|
|                                                                          |                                                 | seafarers,                                                                                                                                                                                                |         |                                                                     |                        |                      |
| <b>Is HIV transmission possible during delivery?</b>                     | UG, NI, MZ, TA, EG,                             | community dwelling women, newly married couples without formal education, prenatal care in women, Students, General population                                                                            | 107,684 | (13,14,30,38,53,74,83)                                              | 66.65 [50.99, 82.30]   | 62.92 [45.98, 79.86] |
| <b>Is HIV transmission possible during breastfeeding?</b>                | UG, NI, GH, MZ, NM, MR, TA, EG,                 | community dwelling women, newly married couples without formal education, seafarers, employees in truck transport sector, Pregnant women, Students, General population                                    | 111,180 | (13,14,19,26,30,38,45,47,53,74,75,83)                               | 73.44 [65.49, 81.39]   | 75.27 [66.98, 83.56] |
| <b>Is HIV contracted through Sexual intercourse?</b>                     | SA, ET, UG, MD, GH, NI, GA, MR, NM, SN, SD, MZ, | Students, Adolescents, Pregnant women, workers, MSM, pediatric caregivers, prenatal care in women, FSW, clients presenting for Male medical circumcision, seafarers, employees in truck transport sector, | 252,482 | (14,16–19,23,26,30,33,37,39,45,47,48,50,60,65,66,68,71,72,75,80,82) | 72.20 [64.25, 80.16]   | 73.36 [65.36, 81.37] |
| <b>Is HIV contracted through Sharing sharp unsterilized objects?</b>     | MZ, SN, MR, NI, GH                              | Students, Pregnant women, prenatal care in women, seafarers, FSW, Pregnant Women, primary school children                                                                                                 | 4,268   | (16,26,30,39,47,48,60,66)                                           | 50.80 [22.19, 79.40]   | 51.52 [23.90, 79.15] |
| <b>Is HIV contracted through Transfusion with unscreened blood?</b>      | NI, GH, SD, SA, UG, ET                          | Students, clients presenting for Male medical, FSW, Pregnant Women, workers                                                                                                                               | 2,595   | (16,19,23,33,37,48,60,66,72,80)                                     | 54.37 [28.12, 80.63]   | 55.61 [28.01, 83.22] |
| <b>Is HIV contracted through shaking hands?</b>                          | NI, MZ, NM, TA, UG                              | Students, Pregnant women, employees in truck transport sector                                                                                                                                             | 2,937   | (16,23,26,30,45,53,75)                                              | 18.28 [7.67, 28.90]    | 19.35 [8.69, 30.01]  |
| <b>Can witchcraft and other spiritual factors cause or transmit HIV?</b> | GH, DC, MZ, NM, TA, NI                          | Students, Outpatients and blood donors, prenatal care in women, general population, employees in truck transport sector, community dwelling women                                                         | 98,442  | (19,25,30,38,45,53,66,83)                                           | 36.10 [29.14, 43.07]   | 34.37 [25.31, 43.43] |
| <b>Is HIV contracted through Intravenous needle?</b>                     | NI, MZ, SD, SA, GA, TA, GH, UG, ET              | students, Pregnant women, clients presenting for Male medical circumcision, FSW, MSM, workers in China first high way engineering Company                                                                 | 4,522   | (23,26,72,75,80,30,33,37,48,50,53,60,65)                            | 64.74 [45.47, 84.01]   | 67.60 [52.14, 83.06] |
| <b>Is HIV transmission possible during blood donation?</b>               | NI, MZ                                          | Pregnant women, Dental tech students                                                                                                                                                                      | 1,384   | (23,26)                                                             | 73.84 [65.94, 81.73]   |                      |
| <b>Is HIV transmission possible through sharing of cups/plates?</b>      | NI, MZ, GH, UG, SA                              | Students, Pregnant women, pediatric caregivers, MSM                                                                                                                                                       | 302,165 | (14,23,26,30,66,68,75,82)                                           | 20.97 [9.72, 32.22]    | 19.22 [7.45, 31.00]  |
| <b>Is HIV transmission possible by hugging and kissing?</b>              | NI, DC, MZ, SA, TA, GH, UG                      | Students, Outpatients and blood donors, clients presenting for Male medical circumcision, pediatric caregivers, pregnant women, MSM                                                                       | 6,287   | (14,25,26,37,53,66,68,75,82)                                        | 26.08 [15.11, 37.05]   | 25.80 [16.41, 35.18] |
| <b>Can coughing and sneezing spread HIV?</b>                             | MZ, GH, SA                                      | MSM, pediatric caregivers, pregnant women                                                                                                                                                                 | 2,239   | (30,68,82)                                                          | 14.94 [6.94, 22.94]    |                      |
| <b>Is HIV transmission possible through toilets?</b>                     | NI, MZ                                          | Pregnant women, Students                                                                                                                                                                                  | 1,786   | (14,26)                                                             | 43.79 [34.97, 52.60]   |                      |
| <b>Is HIV transmission possible through tattoos or perforation?</b>      | MZ                                              | Pregnant women                                                                                                                                                                                            | 1,186   | (26)                                                                | 70 [ 67.6480, 72.35]   |                      |
| <b>Is oral candidiasis associated with HIV infection?</b>                | SA                                              | General population                                                                                                                                                                                        | 2,477   | (24)                                                                | 14.4 [ 13.0280, 15.77] |                      |
| <b>Is herpes zoster associated with HIV infection?</b>                   | SA                                              | General population                                                                                                                                                                                        | 2,477   | (24)                                                                | 17 [ 15.6280 , 18.37]  |                      |

|                                                                                                                       |                                                                                                                                                  |                                                                                                                                                                                                                                                                                                                 |           |                                                                    |                        |                      |
|-----------------------------------------------------------------------------------------------------------------------|--------------------------------------------------------------------------------------------------------------------------------------------------|-----------------------------------------------------------------------------------------------------------------------------------------------------------------------------------------------------------------------------------------------------------------------------------------------------------------|-----------|--------------------------------------------------------------------|------------------------|----------------------|
| <b>Is TB associated with HIV infection?</b>                                                                           | SA                                                                                                                                               | General population, home-based carers                                                                                                                                                                                                                                                                           | 2,621     | (24,34)                                                            | 18.00 [16.66, 19.34]   |                      |
| <b>Is wasting associated with HIV infection?</b>                                                                      | SA                                                                                                                                               | General population                                                                                                                                                                                                                                                                                              | 2,477     | (24)                                                               | 23.8 [ 22.23 , 25.36]  |                      |
| <b>Is sores or abscesses associated with HIV infection?</b>                                                           | SA                                                                                                                                               | General population                                                                                                                                                                                                                                                                                              | 2,477     | (24)                                                               | 23 [21.4320, 24.56]    |                      |
| <b>Is acute respiratory tract infection associated with HIV infection?</b>                                            | SA                                                                                                                                               | General population                                                                                                                                                                                                                                                                                              | 2,477     | (24)                                                               | 26.7 [27.9360 , 31.46] |                      |
| <b>Is constant diarrhea associated with HIV infection?</b>                                                            | SA                                                                                                                                               | General population                                                                                                                                                                                                                                                                                              | 2,477     | (24)                                                               | 17.7 [ 16.3280, 19.07] |                      |
| <b>Do you consider loss of body weight a sign of AIDS?</b>                                                            | SA                                                                                                                                               | General population                                                                                                                                                                                                                                                                                              | 2,477     | (24)                                                               | 43.7 [39.97, 47.41]    |                      |
| <b>Is using condom prevent HIV transmission?</b>                                                                      | BE, BF, BR, CR, CH, Comoros, DC, IC, DC, ET, GB, GH, GU, KY, LE, LI MD, MW, ML, MZ, NM, NG, NI, RW, RS, SN, SL, SW, TA, TO, UG, ZM, ZI, SD, MR,  | General population, Students, Outpatients and blood donors, adolescents, seafarers, rural based traditional healers, employees in truck transport sector, STI service attendees, FSW, Pregnant Women, men of reproductive age, pediatric caregivers, workers, religious leaders, MSM, community dwelling women. | 1,799,374 | (8,13,16,19,23,25,29–31,33,38,39,42,45–48,53,59,60,65–69,75,80–83) | 66.82 [62.65, 70.98]   | 68.05 [63.97, 72.13] |
| <b>Is having one sexual partner prevent HIV transmission?</b>                                                         | BE, BF, BR, CR, CH, Comoros, DC, IC, DC, ET, GB, GH, GU, KY, LE, LI, MD, MW, ML, MZ, NM, NG, NI, RW, RS, SN, SL, SW, TA, TO, UG, ZM, ZI, SD, MR, | General population , Students, Outpatients and blood donors, adolescents, seafarers, rural based traditional healers, employees in truck transport sector, STI service attendees, FSW, Pregnant Women, men of reproductive age, pediatric caregivers, workers, religious leaders, MSM, community dwelling women | 1,799,374 | (8,13,16,19,23,25,29–31,33,38,39,42,45–48,53,59,60,65–69,75,80–83) | 67.61 [64.74, 70.49]   | 70.16 [67.71, 72.60] |
| <b>Is abstinence the best way of preventing HIV?</b>                                                                  | GH, NI, SN, SA, TA, CR.                                                                                                                          | Students, seafarers, rural based traditional healers, religious leaders                                                                                                                                                                                                                                         | 3,794     | (19,23,31,39,42,53,59,63, 65,66,81)                                | 64.54 [48.67, 80.41]   |                      |
| <b>Do you consider showering or washing one's genitals / private parts after sex keeps a person from getting HIV?</b> | GH, MZ, SA.                                                                                                                                      | Pregnant women, pediatric caregivers, MSM.                                                                                                                                                                                                                                                                      | 2,239     | (30,68,82)                                                         | 19.76 [0.20, 39.32]    |                      |
| <b>Did you practice HIV testing during last pregnancy?</b>                                                            | ET                                                                                                                                               | Pregnant women                                                                                                                                                                                                                                                                                                  | 1,325     | (21)                                                               | 89.30 [87.54, 91.06]   |                      |
| <b>Is it ok for a person with HIV to teach?</b>                                                                       | NI, GH, UG                                                                                                                                       | General population, primary school children, community dwelling women                                                                                                                                                                                                                                           | 50,037    | (13,66,83)                                                         | 44.80 [10.14, 79.46]   |                      |
| <b>Is it ok to care for a relative with HIV in household?</b>                                                         | UG, NI                                                                                                                                           | community dwelling women, General population                                                                                                                                                                                                                                                                    | 49,917    | (13,83)                                                            | 62.95 [11.11, 114.79]  |                      |
| <b>Is it ok to buy vegetables from a vendor with HIV?</b>                                                             | UG, NI                                                                                                                                           | community dwelling women, General population                                                                                                                                                                                                                                                                    | 49,917    | (13,83)                                                            | 57.11 [25.72, 88.50]   |                      |
| <b>Do you have feelings of high stigma towards HIV-infected</b>                                                       | UG                                                                                                                                               | General population, older adults                                                                                                                                                                                                                                                                                | 2,472     | (55)                                                               | 31.10 [29.34, 32.86]   |                      |

|                                           |        |                                           |       |            |                      |  |
|-------------------------------------------|--------|-------------------------------------------|-------|------------|----------------------|--|
| patients?                                 |        |                                           |       |            |                      |  |
| Condom utilization in the last 12 months? | ET     | university students,                      | 1,695 | (73,78)    | 51.63 [25.26, 77.99] |  |
| Is HIV transmit through oral sex?         | SA, MZ | Men Who Have Sex with Men, Pregnant women | 4,227 | (26,30,82) | 34.14 [-0.43, 68.71] |  |

215

216 \* Country codes are as follow:

217 Benin=BE, Burkina Faso=BF, Burundi=BR, Cameroon=CR, Democratic Republic of the Congo=DC, Egypt=EG,  
 218 Ethiopia=ET, Gabon=GB, Gambia=GA, Ghana=GH, Guinea=GU, Kenya=KY, Lesotho=LE, Liberia=LI,  
 219 Madagascar=MD, Malawi =MW, Mali=ML, Morocco=MR, Mozambique=MZ, Namibia=NM, Niger=NG,  
 220 Nigeria=NI, Chad=CH, Republic of Sao Tome and Principe=RS, Rwanda=RW, Senegal=SN, Sierra Leone=SL,  
 221 South Africa=SA, Sudan=SD, Swaziland=SW, Tanzania=TA, Togo=TO, Uganda=UG, Zambia=ZM,  
 222 Zimbabwe=ZI

223 \*\* Sensitivity analysis was conducted wherever population of proposed high level of knowledge or population  
 224 proposed to behave in indifference was participated in a question.

225

226 **Fig (2):** Meta analysis of 1,799,374 Africans' yes response to the question "Is using condom  
 227 prevent HIV transmission?"

228

## 229 Nigeria

230 Eleven included studies in regard to HIV were conducted among Nigerians representing a total  
 231 population of 98,279 participants; three studies were conducted in Oyo State <sup>[14,16,63]</sup> and one in each  
 232 of Osun State <sup>[17]</sup>, Ekiti State <sup>[18]</sup>, Enugu State <sup>[23]</sup>, Kano State <sup>[48]</sup>, Sokoto State <sup>[81]</sup> and Ogun State <sup>[60]</sup>.  
 233 Two studies were nationally representative and participants were from different States <sup>[38,83]</sup>. The  
 234 oldest among the study included were conducted in 2010 while the newest were conducted in 2013  
 235 (Table S3). Population under study was found to be mainly students and adolescents (6/11), while one  
 236 was toward each of pregnant women, religious leaders, general population, female sex workers and  
 237 community dwelling women (Table S3). Majority of studies were conducted among both genders  
 238 (7/11), three studies were toward females only while one study included only males. Age of  
 239 respondents ranged from 12 to 49 years. Twenty two questions were asked to the participants that are  
 240 related to the knowledge and awareness of HIV as general, transmission routes, clinical symptoms,  
 241 pathological consequences and prevention attitude, among which 18 questions were analyzed and  
 242 synthesized. The question ‘‘ Using condom will reduce HIV transmission?’’ was answered by 57,430  
 243 participants; 52,67% [95% CI; 44.42, 60.91] answered yes. The question ‘Is HIV can be transmitted  
 244 through mosquito bites?’’ was answered by 95,856 participants; 16.86% [95% CI; 6.77, 26.95]  
 245 answered yes. Questions asked, their corresponding study's characteristics, the pooled prevalence and

246 the confidence intervals are depicted in (Table 3). Heterogeneity was high in all questions ( $I^2$  more  
247 than 80%).

248

249 **Table (3):** Awareness of HIV-related knowledge among Nigerian population

| Questions                                                          | Study population/s                                                                             | Total sample size | References             | Pooled prevalence of yes response [95% CI] |
|--------------------------------------------------------------------|------------------------------------------------------------------------------------------------|-------------------|------------------------|--------------------------------------------|
| Is using condom reduce HIV transmission?                           | Students, general population, FSW, Pregnant Women, religious leaders, community dwelling women | 96,378            | (16,23,38,48,60,81,83) | 52.67 [44.42, 60.91]                       |
| having one sexual partner will reduce HIV transmission?            | Students, general population, Pregnant Women, community dwelling women                         | 96,096            | (16,23,38,60,83)       | 57.67 [48.52, 66.81]                       |
| Healthy person can be HIV infected ?                               | general population, community dwelling women                                                   | 95,255            | (38,83)                | 76.95 [68.43, 85.48]                       |
| HIV can be transmitted through mosquito bites                      | Dental tech students, general population, Pregnant Women, community dwelling women             | 95,856            | (23,38,60,83)          | 16.86 [6.77, 26.95]                        |
| HIV can be transmitted through sharing food                        | general population, community dwelling women                                                   | 95,255            | (38,83)                | 16.30 [11.60, 21.01]                       |
| Is it OK for a person with HIV to teach                            | community dwelling women                                                                       | 38,948            | (83)                   | 51.60%                                     |
| Is it OK to care for a relative with HIV in household              | community dwelling women                                                                       | 38,948            | (83)                   | 63.50%                                     |
| Is it ok to buy vegetables from a vendor with HIV?                 | community dwelling women                                                                       | 38,948            | (83)                   | 41.10%                                     |
| Is HIV transmission possible during pregnancy?                     | Students, general population(NDHS), Pregnant Women, community dwelling women                   | 96,498            | (14,16,38,60,83)       | 45.09 [40.10, 50.08]                       |
| Is HIV transmission possible during delivery?                      | Students, general population, community dwelling women                                         | 95,855            | (14,38,83)             | 56.86 [54.43, 59.29]                       |
| Is HIV transmission possible during breastfeeding?                 | Students, general population, community dwelling women                                         | 95,855            | (14,38,83)             | 66.72 [62.89, 70.56]                       |
| Have you heard about HIV before?                                   | Students, general population, Pregnant Women                                                   | 56,950            | (16,38,60)             | 94.09 [91.18, 97.00]                       |
| Is HIV contracted through Sexual intercourse?                      | Students, Adolescents, FSW, Pregnant Women,                                                    | 2,446             | (14,16–18,23,48,60)    | 68.09 [41.80, 94.38]                       |
| contracted through Sharing sharp unsterilized objects?             | Students, FSW, Pregnant Women                                                                  | 767               | (16,48,60)             | 46.87 [10.49, 83.25]                       |
| Is HIV contracted through unscreened blood?                        | Students, FSW, Pregnant Women                                                                  | 965               | (16,23,48,60)          | 51.17 [4.52, 97.82]                        |
| Is HIV contracted through shaking hands?                           | Students, Dental tech students                                                                 | 438               | (16,23)                | 2.89 [-2.20, 7.98]                         |
| Is HIV contracted through witchcraft and other spiritual factors ? | general population(NDHS),community dwelling women                                              | 95,255            | (38,83)                | 24.05 [11.21, 36.89]                       |
| Is abstinence the best way of preventing HIV?                      | students, religious leaders                                                                    | 776               | (23,63,81)             | 55.77 [14.32, 97.22]                       |
| Is HIV contracted through intravenous needles?                     | Dental tech students, FSW, Pregnant Women                                                      | 725               | (23,48,60)             | 61.47 [7.39, 115.56]                       |
| Is HIV contracted through sharing of cups/plates?                  | Students                                                                                       | 798               | (14,23)                | 32.50 [-3.52, 68.51]                       |
| DO you knows a place to get HIV testing?                           | general population                                                                             | 56,307            | (38)                   | 68.9                                       |

250

## 251 South Africa

252 Nine included studies in regard to HIV were conducted among South Africans representing a total  
253 population of 17,320 participants; two studies were conducted in KwaZulu-Natal province [24,37] and  
254 one was conducted in each of Gauteng Province [29], Northern Cape province [42], North West province  
255 [34], two studies were toward online internet users [27,82], one study was conducted in Eastern Cape,

256 Western Cape, Free State and Gauteng Provinces <sup>[46]</sup> while another study was nationally representative  
 257 <sup>[84]</sup> (Table S4). The oldest among the study included was conducted in 2010 while the newest was  
 258 conducted after 2010. Population under study was distributed among circumcised males, men who  
 259 have sex with men or indicated interest in men, general population and home-based carers (Table S3).  
 260 Majority of studies were conducted among both genders (5/9), while four were toward males only  
 261 (ref). Age of respondents was from 15 to more than 25 years. Thirty two questions were asked to the  
 262 participants that are related to the knowledge and awareness of HIV as general, transmission routes,  
 263 clinical symptoms and prevention attitude, among which 16 questions were analyzed and synthesized.  
 264 The question ‘Using condom will reduce HIV transmission?’ was answered by 3,979 participants ;  
 265 64.46% [95% CI; 31.00, 97.91] answered yes. The question ‘‘Do you perceive risk of contracting  
 266 HIV?’’ was answered by 11,472 participants; 42.45% [95% CI; -36.04, 120.05] answered yes.  
 267 Questions asked, their corresponding study's characteristics data, the pooled prevalence and the  
 268 confidence intervals are depicted in (Table 4). Heterogeneity was high in all questions ( $I^2$  more than  
 269 80%).

270

271 **Table (4):** Awareness of HIV-related knowledge among South African population

| Question                                                     | Study population/s                                                                                                                    | Total sample size | References    | Pooled prevalence of yes response [95% CI] |
|--------------------------------------------------------------|---------------------------------------------------------------------------------------------------------------------------------------|-------------------|---------------|--------------------------------------------|
| <b>Using condom will reduce HIV transmission?</b>            | General population, home-based carers, rural based traditional healers (THs), STI service attendees, Men Who Have Sex with Men (MSM). | 3,979             | (29,42,46,82) | 64.46 [31.00, 97.91]                       |
| <b>Is having one sexual partner reduce HIV transmission?</b> | rural based traditional healers, Men Who Have Sex with Men (MSM).                                                                     | 1,779             | (42,82)       | 83.15 [55.03, 111.27]                      |
| <b>A healthy person can be HIV infected ?</b>                | MSM                                                                                                                                   | 1,593             | (82)          | 94.80% [88.51, 98.23]                      |
| <b>Is HIV transmission possible during pregnancy?</b>        | General population, MSM                                                                                                               | 1,987             | (37,82)       | 77.33 [53.32, 101.34]                      |
| <b>Is HIV contracted through Sexual intercourse?</b>         | General population, MSM                                                                                                               | 1,987             | (37,82)       | 91.55 [80.48, 102.62]                      |

|                                                                                                                 |                                                                                     |        |         |                        |
|-----------------------------------------------------------------------------------------------------------------|-------------------------------------------------------------------------------------|--------|---------|------------------------|
| Is HIV contracted through sharing cups/plates?                                                                  | (MSM)                                                                               | 1,593  | (82)    | 7 [6.03, 8.27]         |
| Do you perceive risk of contracting HIV?                                                                        | men who indicated an interest in men, medically and traditionally circumcised males | 11,472 | (27,84) | 42.45 [-36.04, 120.95] |
| Is ignorance the reason that stigma and discrimination related to HIV testing?                                  | General population                                                                  | 1,146  | (29)    | 46.34 [39.01, 52.51]   |
| Are the social stigma and discrimination barriers to HIV testing?                                               | General population                                                                  | 1,146  | (29)    | 37.43 [35.11, 39.24]   |
| Is your perception of the risk of getting HIV infection low?                                                    | General population                                                                  | 1,146  | (29)    | 51.83 [50.07, 53.00]   |
| Is HIV contracted through hugging and kissing                                                                   | General population, MSM                                                             | 1,987  | (37,82) | 4.94 [-0.83, 10.71]    |
| Do you consider loss of body weight a sign of AIDS?                                                             | General population, home-based caregivers.                                          | 2,477  | (24)    | 34.34[29.25, 41.78]    |
| Is HIV contracted through oral sex?                                                                             | MSM                                                                                 | 1,593  | (82)    | 18 [15.08, 25.26]      |
| Is HIV contracted through coughing and sneezing                                                                 | MSM                                                                                 | 1,593  | (82)    | 8.40 [2.11, 15.85]     |
| Do you consider pulling the penis out before a man climaxes/cums keeps his partner from getting HIV during sex? | MSM                                                                                 | 1,593  | (82)    | 4.80 [3.02, 6.25]      |
| Showering or washing one's genitals / private parts after sex keeps a person from getting HIV                   | MSM                                                                                 | 1,593  | (82)    | 1.40 [-0.55, 3.49]     |
| Do you consider Oral candidiasis a sign of AIDS?                                                                | General population                                                                  | 2,477  | (24)    | 14.40 [12.45, 18.26]   |
| Do you consider Herpes zoster a sign of AIDS?                                                                   | General population                                                                  | 2,477  | (24)    | 17 [16.08, 18.27]      |
| Do you consider TB a sign of AIDS?                                                                              | General population, home-based carers                                               | 2,621  | (24,34) | 18 [16.25, 19.95]      |
| Do you consider Wasting a sign of AIDS?                                                                         | General population                                                                  | 2,477  | (24)    | 23.80 [20.15, 14.50]   |
| Do you consider Sores/abscesses a sign of AIDS?                                                                 | General population                                                                  | 2,477  | (24)    | 23 [21.45, 25.96]      |
| Do you consider acute respiratory tract infection a sign of AIDS?                                               | General population                                                                  | 2,477  | (24)    | 29.70 [25.13, 32.76]   |
| Do you consider constant diarrhea abscesses a sign of AIDS?                                                     | General population                                                                  | 2,477  | (24)    | 17.70 [14.29, 20.19]   |

272

273

## 274 Adolescents

275 The study participants' age were equal or less than 25 years in thirteen HIV-related included studies,  
 276 representing a total population of 5,908 participants; five studies were conducted in Nigeria [14,16–18,63],  
 277 three in Ghana [19,31,66], two in Mozambique [26,30], and one in each of Cameroon [59], Madagascar [71]  
 278 and Uganda [72]. Majority of studies were toward students and adolescents (11/13) while two studies  
 279 were conducted among pregnant women. Majority of studies were conducted among both genders  
 280 (11/13), while two were toward females only (pregnant women) (Table S5 ). Age of respondents was  
 281 from 12 to 25 years. Twenty two questions were asked to the participants that are related to the  
 282 knowledge and awareness of HIV as general, transmission routes, clinical symptoms and prevention  
 283 attitude, among which 21 questions were analyzed and synthesized. The question ‘‘Do you think HIV  
 284 is contracted through Sexual intercourse?’’ was answered by 4,122 participants; 67.81% [95% CI;  
 285 50.66, 84.96] answered yes. The question ‘‘Do you think sharing cups/plates can transmit HIV?’’ was



286 answered by 2,254 participants; 33.51% [95% CI; 9.43, 57.59] answered yes. Questions asked, their  
 287 corresponding studies' characteristics, the pooled prevalence and the confidence intervals are depicted  
 288 in (Table 5). Heterogeneity was high in all questions ( $I^2$  more than 80%).

289

290 **Table (5):** Awareness of HIV-related knowledge among adolescents in Africa

| Question                                                               | Country/ies                                    | Study population                                                  | Total sample size | First author's last name  | Pooled prevalence of yes response [95% CI] |
|------------------------------------------------------------------------|------------------------------------------------|-------------------------------------------------------------------|-------------------|---------------------------|--------------------------------------------|
| Using condom will reduce HIV transmission?                             | Nigeria, Ghana, Mozambique, Cameroon           | Students, prenatal care in women, adolescents, general population | 2,214             | (16,19,30,31,59)          | 75.55 [41.92, 109.19]                      |
| having one sexual partner will reduce HIV transmission?                | Nigeria, Mozambique, Cameroon, Ghana           | Students, prenatal care in women                                  | 1,172             | (16,30,59,66)             | 48.45 [2.11, 94.79]                        |
| Healthy person can be HIV infected ?                                   | Ghana, Mozambique, Cameroon, Uganda            | Students, prenatal care in women                                  | 1,317             | (19,30,59,72)             | 60.75 [23.58, 97.92]                       |
| Is transmission possible through mosquito bites?                       | Mozambique, Cameroon, Ghana                    | Pregnant women, students                                          | 1,770             | (26,59,66)                | 43.54 [19.80, 67.29]                       |
| HIV transmission possible during pregnancy?                            | Nigeria, Mozambique                            | Students, Pregnant women                                          | 2,026             | (14,16,26)                | 58.40 [29.92, 86.89]                       |
| Is transmission possible through sharing food?                         | Cameroon, Ghana                                | students                                                          | 584               | (59,66)                   | 27.01 [-11.11, 65.13]                      |
| Is transmission possible through Delivery?                             | Nigeria, Mozambique                            | Students, pregnant women                                          | 948               | (14,30)                   | 55.76 [52.34, 59.17]                       |
| Is transmission possible through Breastfeeding?                        | Nigeria, Ghana, Mozambique, Mozambique         | Students, pregnant women                                          | 2,394             | (14,19,26,30)             | 74.45 [57.01, 91.90]                       |
| You have heard about HIV before?                                       | Nigeria, Uganda                                | Students                                                          | 485               | (16,72)                   | 93.35 [89.55, 97.15]                       |
| It is possible to cure HIV?                                            | Nigeria, Mozambique, Cameroon, Uganda          | Students, prenatal care in women                                  | 1,297             | (16,30,59,72)             | 46.99 [13.62, 80.35]                       |
| HIV is contracted through Sexual intercourse?                          | Nigeria, Ghana, Mozambique, Madagascar, Uganda | Students, Adolescents, Pregnant women                             | 4,122             | (14,16-19,26,30,66,71,72) | 67.81 [50.66, 84.96]                       |
| HIV is contracted through transfusion with unscreened blood?           | Nigeria, Ghana, Uganda                         | Students                                                          | 865               | (16,19,66,72)             | 30.89 [-3.39, 65.17]                       |
| HIV is contracted through Sharing sharp unsterilized objects?          | Nigeria, Mozambique, Ghana                     | Students, Pregnant women                                          | 1,894             | (16,26,30,66)             | 54.27 [29.66, 78.88]                       |
| HIV is contracted through shaking hands?                               | Nigeria, Mozambique                            | Students, Pregnant women                                          | 1,774             | (16,26,30)                | 19.53 [-0.03, 39.08]                       |
| Witchcraft and other spiritual factors can cause or transmit HIV/AIDS? | Ghana, Mozambique                              | Students, pregnant women                                          | 728               | (19,30,66)                | 42.64 [15.55, 69.73]                       |
| Abstinence is the best way of preventing HIV/AIDS                      | Ghana, Cameroon, Nigerian city, Nigeria        | Students, adolescents, general population                         | 2,166             | (19,31,59,63,66)          | 56.15 [26.66, 85.63]                       |
| HIV is contracted through intravenous needle sticks?                   | Mozambique, Mozambique, Uganda                 | Pregnant women, school students                                   | 1,779             | (26,30,72)                | 51.63 [25.26, 77.99]                       |
| HIV is contracted through sharing cups/plates?                         | Nigeria, Mozambique, Ghana                     | Students, Pregnant women                                          | 2,254             | (14,26,30,66)             | 33.51 [9.43, 57.59]                        |
| HIV is contracted through hugging and kissing?                         | Nigeria, Mozambique, Ghana                     | Students, Pregnant women                                          | 1,906             | (14,26,66)                | 25.83 [-4.73, 56.38]                       |
| HIV is contracted through oral sex?                                    | Mozambique                                     | Pregnant women                                                    | 1,534             | (26,30)                   | 42.22 [-9.13, 93.57]                       |
| HIV is contracted through sharing toilets?                             | Nigeria, Mozambique                            | Students, Pregnant women                                          | 1,786             | (14,26)                   | 43.79 [34.97, 52.60]                       |

|                                                    |            |                |       |      |                       |
|----------------------------------------------------|------------|----------------|-------|------|-----------------------|
| HIV is contracted through tattoos or perforations? | Mozambique | Pregnant women | 1,186 | (26) | 74% [71.6480 , 76.35] |
|----------------------------------------------------|------------|----------------|-------|------|-----------------------|

291

## 292 **Awareness related to demographic characteristics**

293 Media (as general) was the main source of information of participants reported in several  
294 studies [17,47,74]. However, other studies among students reported that school is the main source  
295 of information not media [22,75]. Health professionals was the least mentioned source of  
296 information in the study of Saleh and colleagues [74].

297 Chaquise and colleagues in their recently published study (2018) determined women's age as not  
298 significantly associated with HIV and HBV knowledge. Moreover, they determined that to have heard  
299 about HIV/AIDS, Syphilis, Gonorrhoea, Hepatitis B or Hepatitis C, was associated with better  
300 knowledge about HIV transmission modes [26].

301 Two studies indicated a statistically significant difference in the HIV/AIDS knowledge scores  
302 and the marital/ relationship status [38,65]. Nevertheless, another study indicated that no relation  
303 exists. This last study also reported that stigma toward HIV was significantly associated with  
304 knowledge scores of HIV as well as education level, female (sex) while place of residence  
305 (rural versus urban) is not [55].

306 One study concluded that Comprehensive knowledge of HIV is significantly associated with  
307 more media items and fewer children at home [30].

308 Regarding religion, Christians compared to Muslims have been found to significantly have  
309 better knowledge of HIV/AIDS. Nevertheless, another study found that Muslim students scored  
310 higher on HIV/AIDS knowledge than Christian students [65,81].

311 Several studies indicated that the level of education and age have a significant association with  
312 the knowledge of HIV transmission [21,39,48]. Additionally, one study [81] agreed that only  
313 education level is associated, while another agreed that only age is associated [77]. Nevertheless,  
314 Faye and colleagues only concluded that marital status is associated to the knowledge of HIV  
315 transmission [39].

316 Seyoum and colleagues concluded that female participants who heard about HIV was  
317 significantly higher than that of the male participants. Moreover, there was a significant  
318 difference between males and females who suggested unsafe sexual intercourse as mode of  
319 transmission of HIV [77]. However, Yaya and colleagues found that the majority of participants

320 (females) (N=32,123, 82.5%) believe on contracting the virus via supernatural means as a mode  
 321 of transmission [83].

### 322 Hepatitis B Virus (HBV)

323 Fourteen included studies assessed the awareness of 9,446 Africans in regard to HBV, three studies  
 324 were conducted in each of Nigeria [61,62,64], Cameroon [20,40,58] and Ghana [12,15,28], two in Ethiopia [32,52],  
 325 one in each of Kenya, Mozambique and Madagascar [26,57,71]. The oldest among the study included  
 326 was conducted in 2010 while the newest was conducted in 2016 (Table 1). Population under study was  
 327 found to be mainly students and adolescents and pregnant women (10/14), one study was targeting  
 328 each of non medical staff of health facilities, general population, barbers and traders (Table 1).  
 329 Majority of studies were conducted among both genders (8/14), five studies were toward females only  
 330 (pregnant women) while one study included only males (barbers). Age of respondents ranged from 10  
 331 to 75 years. Fifteen questions were asked to the participants that are related to the knowledge and  
 332 awareness of HBV as general, transmission routes, clinical symptoms, pathological consequences and  
 333 prevention attitude, among which 13 questions were analyzed and synthesized. The question ‘‘Do you  
 334 know HBV?’’ was answered by 4,066 participants in Ghana, Mozambique, Ethiopia, Nigeria and  
 335 Madagascar; 53.84% [95% CI; 27.68, 79.99] answered yes. The question ‘‘Does sexual contact is a  
 336 possible route of HBV transmission?’’ was answered by 7,490 participants in Ghana, Mozambique,  
 337 Ethiopia, Cameroon and Nigeria; 42.58% [95% CI; 20.45, 64.71] answered yes. Questions asked, their  
 338 corresponding articles’ data, the pooled prevalence and the confidence intervals are depicted in (Table  
 339 6). Heterogeneity was high in all questions ( $I^2$  more than 80%).

340

341 **Table (6):** Awareness of HBV-related knowledge among Africans

| Question                                                                 | Country/ies                                             | Study population/s                                                                                 | Total sample size | References                   | Pooled prevalence of yes response [95% CI] |
|--------------------------------------------------------------------------|---------------------------------------------------------|----------------------------------------------------------------------------------------------------|-------------------|------------------------------|--------------------------------------------|
| <b>Do you know HBV?</b>                                                  | Ghana, Mozambique, Ethiopia, Kenya, Nigeria, Madagascar | Barbers, Pregnant women, students, general population                                              | 4,570             | (12,15,26,28,52,57,62,71)    | 53.84 [27.68, 79.99]                       |
| <b>HBV can damage liver?</b>                                             | Ghana, Ethiopia, Cameroon, Nigeria                      | students, pregnant women, general population                                                       | 2,735             | (28,32,40,52,62)             | 61.43 [31.34, 91.52]                       |
| <b>Does Blood transfusion is a possible route of HBV transmission?</b>   | Ghana, Mozambique, Ethiopia, Cameroon, Nigeria          | Barbers, Pregnant women, Students, traders, general population, Administration staff of a hospital | 7,490             | (15,26,32,40,52,58,61,62,64) | 56.16 [28.62, 83.69]                       |
| <b>Does reusing needles is a possible route of HBV transmission? (5)</b> | Ghana, Mozambique, Ethiopia, Cameroon, Nigeria          | Barbers, Pregnant women, Students, general population, Administration staff of a hospital          | 7,155             | (15,26,32,40,52,58,62,64)    | 52.72 [26.96, 78.48]                       |

|                                                                                 |                                                |                                                                                                            |       |                              |                       |
|---------------------------------------------------------------------------------|------------------------------------------------|------------------------------------------------------------------------------------------------------------|-------|------------------------------|-----------------------|
| <b>Does sharing blades is a possible route of HBV transmission?</b>             | Ghana, Mozambique, Ethiopia, Cameroon, Nigeria | Barbers, Pregnant women, medicine and health science students, traders, Administration staff of a hospital | 5,437 | (15,26,32,40,61,64)          | 39.75 [4.40, 75.10]   |
| <b>Does tattooing is a possible route of HBV transmission?</b>                  | Ghana, Mozambique, Nigeria                     | Barbers, Pregnant women, traders, general population                                                       | 3,341 | (15,26,61,62)                | 28.20 [5.03, 51.36]   |
| <b>Does sexual contact is a possible route of HBV transmission?</b>             | Ghana, Mozambique, Ethiopia, Cameroon, Nigeria | Barbers, Pregnant women, Students, traders, general population, Administration staff of a hospital         | 7,490 | (15,26,32,40,52,58,61,62,64) | 42.58 [20.45, 64.71]  |
| <b>Does mosquito bites is a possible route of HBV transmission?</b>             | Mozambique, Nigeria                            | Pregnant women, general population                                                                         | 2,806 | (26,62)                      | 28.49 [-3.85, 60.83]  |
| <b>Does mother to child is a possible route of HBV transmission?</b>            | Mozambique, Ethiopia, Nigeria                  | pregnant women, Students, general population                                                               | 3,745 | (26,28,32,52,62)             | 57.55 [35.98, 79.12]  |
| <b>Hepatitis B can be transmitted through feco-oral route</b>                   | Ethiopia, Cameroon                             | medical students                                                                                           | 519   | (32,58)                      | 48.65 [6.51, 90.79]   |
| <b>Does toothbrush sharing is a possible route of HBV transmission?</b>         | Nigeria                                        | General population                                                                                         | 1,620 | (62)                         | 49 [ 46.6480 , 51.35] |
| <b>HBV can be asymptomatic?</b>                                                 | Ethiopia, Cameroon                             | pregnant women, medicine and health science students                                                       | 793   | (20,28,32,40)                | 58.12 [23.38, 92.85]  |
| <b>HBV can be prevented by avoiding casual sex or multi sexual partnership?</b> | Ethiopia                                       | medicine and health science students                                                                       | 408   | (32)                         | 87 [ 83.8641 , 90.13] |
| <b>Do you know HBV vaccination?</b>                                             | Ethiopia, Cameroon                             | pregnant women, Students                                                                                   | 1,226 | (28,32,40,52,58)             | 72.36 [50.69, 94.03]  |

342

### 343 **Awareness related to demographic characteristics**

344 Abdulai and colleagues in their study among pregnant women determined that level of education and  
 345 occupation are significantly associated to hepatitis B awareness [12]. Frambo and colleagues among the  
 346 same population concluded that education is significantly associated to the level of awareness as well  
 347 [40]. Furthermore, Ngaira and colleagues assessed the awareness as well as vaccination status among  
 348 the same population (pregnant women) and indicated a significant difference between vaccine uptake  
 349 and education [57].

350 Noubiap and colleagues assessed HBV vaccine uptake but among medical students, and indicated that  
 351 duration of study but not age and vaccination status are significantly correlated. Nevertheless  
 352 Okonkwo and colleagues in their study among traders concluded that knowledge of the nature of HBV  
 353 virus varied significantly according to age [58,61].

354

### 355 **Hepatitis C Virus (HCV)**

356 Six included studies assessed the awareness of 2,306 Africans in regard to HCV, two studies were  
 357 conducted in Egypt [74,79] and one in each of Ghana [15], Mozambique [26], Ethiopia [32] and Madagascar  
 358 [71]. The oldest among the study included was conducted after 2010 while the newest was conducted in  
 359 2015 (Table 1). Population under study was distributed among students and adolescents, general  
 360 population, HCV positive patients, pregnant women and barbers (Table 1). Four studies were  
 361 conducted among both genders, one toward females only and one toward males only (Table 1). Age of  
 362 respondents range from 18 to 80 years. Seventeen questions were asked to the participants that are  
 363 related to the knowledge and awareness of HCV as general, transmission routes, clinical symptoms,  
 364 pathological consequences and prevention attitude, among which 10 questions were analyzed and  
 365 synthesized. The question ‘‘Does sexual contact is a possible route of HCV transmission?’’ was  
 366 answered by 1,997 Africans in Ghana, Mozambique, Ethiopia and Egypt; 30.61% [95% CI; 2.04,  
 367 59.17] answered yes. The question ‘‘Hepatitis C infection can be prevented by vaccination?’’ was  
 368 answered by 611 participants in Ethiopia and Egypt; 42.05 [95% CI; 8.73, 75.37] answered yes.  
 369 Questions asked, their corresponding articles’ data, the pooled prevalence and the confidence intervals  
 370 are depicted in (Table 7). Heterogeneity was high in all questions ( $I^2$  more than 80%).

371

372 **Table (7):** Awareness of HCV-related knowledge among Africans

| Question                                                         | Country/ies                        | Study population/s                                                          | Total sample size | References    | Pooled prevalence of yes response [95% CI] |
|------------------------------------------------------------------|------------------------------------|-----------------------------------------------------------------------------|-------------------|---------------|--------------------------------------------|
| Have you ever heard about viral hepatitis C?                     | Ghana, Mozambique, Egypt           | Barbers, Pregnant women, university students, HCV patients                  | 1,831             | (15,26,71)    | 20.21 [5.42, 35.00]                        |
| Do you know what cause HCV infection?                            | Egypt                              | General population                                                          | 67                | (74)          | 87 [ 68.2002 , 87.79]                      |
| Is HCV can be cured?                                             | Egypt                              | General population                                                          | 67                | (74)          | 39 [ 27.4362 , 50.56]                      |
| Hepatitis C can cause liver cancer?                              | Ethiopia, Egypt                    | medicine and health science students, HCV patients                          | 611               | (32,79)       | 89.50 [87.15, 91.85]                       |
| Does Blood transfusion is a possible route of HCV transmission?  | Ghana                              | Barbers                                                                     | 200               | (15,79)       | 86.40 [81.70, 91.10]                       |
| Does reusing needles is a possible route of HCV transmission?    | Ghana, Mozambique, Ethiopia, Egypt | Barbers, Pregnant women, medicine and health science students, HCV patients | 1,997             | (15,26,32,79) | 68.82 [16.96, 120.69]                      |
| Does sharing blades is a possible route of HCV transmission?     | Ghana, Mozambique, Egypt           | Barbers, Pregnant women, HCV patients                                       | 1,589             | (15,26,79)    | 54.72 [-9.47, 118.91]                      |
| Does tatooining is a possible route of HCV transmission?         | Ghana, Mozambique                  | Barbers, Pregnant women                                                     | 1,386             | (15,26)       | 21.60 [19.44, 23.76]                       |
| Does sexual contact is a possible route of HCV transmission?     | Ghana, Mozambique, Ethiopia, Egypt | Barbers, Pregnant women, medicine and health science students, HCV patients | 1,997             | (15,26,32,79) | 30.61 [2.04, 59.17]                        |
| Can mother transmit HCV to infants?                              | Mozambique, Ethiopia               | Pregnant women, medicine and health science students                        | 1,594             | (26,32)       | 52.89 [-9.64, 115.41]                      |
| Does mosquito bite is a possible route of HCV transmission?      | Mozambique                         | Pregnant women                                                              | 1,186             | (26)          | 10.3 [ 8.7320 , 11.86]                     |
| Hepatitis C can be transmitted through feco-oral route?          | Ethiopia                           | medicine and health science students                                        | 408               | (32)          | 70.3 [ 65.9881 , 74.61]                    |
| Does sharing toothbrush is a possible route of HCV transmission? | Mozambique, Egypt                  | Pregnant women, HCV patients                                                | 1,389             | (32,79)       | 52.46 [-7.32, 112.24]                      |

|                                                                    |                 |                                                    |     |         |                       |
|--------------------------------------------------------------------|-----------------|----------------------------------------------------|-----|---------|-----------------------|
| Do you know any of HCV disease symptoms?                           | Egypt           | Residents                                          | 67  | (74)    | 55 [ 43.2402 , 66.75] |
| infection can be asymptomatic?                                     | Ethiopia        | medicine and health science students               | 408 | (32)    | 55 [ 50.2961 , 59.70] |
| Hepatitis C infection can be prevented by vaccination?             | Ethiopia, Egypt | medicine and health science students, HCV patients | 611 | (32,79) | 42.05 [8.73, 75.37]   |
| Hepatitis C can be prevented by avoiding multi sexual partnership? | Ethiopia        | medicine and health science students               | 408 | (32)    | 87 [ 83.8641 , 90.13] |

373

### 374 **Awareness related to demographic characteristics**

375 Adoba and colleagues conducted their study among barbers - individuals of a sharp shaving objects'  
 376 based occupation, nevertheless, the radio was the major source of information on HCV infection (25.0  
 377 %) [15].

378 Demssis and colleagues in 2018 conducted a study among medicine and health science students in  
 379 Ethiopia and determined that student's residence and department were significantly associated with  
 380 good level of knowledge toward transmission and prevention of hepatitis B and C infection [32].

### 381 **Human Papillomavirus (HPV)**

382 Nine included studies assessed the awareness of 5,157 Africans in regard to HPV, four studies were  
 383 conducted in Nigeria [35,36,41] and one in each of Madagascar, Morocco, Mali, South Africa and  
 384 Senegal [43,49,51,54,70,71]. The oldest among the study included was conducted in 2010 while the newest  
 385 was conducted in 2016 (Table 1). Population under study was found to be mainly adolescents and  
 386 students (6/9), while two studies was targeting general population and one was targeting HIV positive  
 387 and negative females (Table 1). Majority of studies were conducted among both genders (6/9), while  
 388 three studies were toward females only. Age of respondents range from 15 to older than 67 years.  
 389 Fifteen questions were asked to the participants that are related to the knowledge and awareness of  
 390 HPV as general, transmission routes, clinical symptoms, pathological consequences and prevention  
 391 attitude, among which 13 questions were analyzed and synthesized. The question "Do you know  
 392 HPV?" was answered by 5,076 participants in Nigeria, Senegal, Morocco and Madagascar; 25.18%  
 393 [95% CI; 13.31, 37.06] answered yes. The question "Are you aware of a vaccine for the prevention of  
 394 HPV?" was answered by 2,548 participants in Nigeria and Morocco; 26.15% [95% CI; 13.36, 38.93]  
 395 answered yes. Furthermore; the question "Do you know that HPV is a sexually transmitted infection"  
 396 was answered by 1,409 participants in Nigeria, South Africa and Mali; 38.16% [95% CI; 15.10, 61.22]  
 397 answered yes. Questions asked, their corresponding articles' data, the pooled prevalence and the

398 confidence intervals are depicted in (Table 8). Heterogeneity was high in all questions ( $I^2$  more than  
399 80%).

400

401 **Table (8):** Awareness of HPV-related knowledge among Africans

| Question                                                 | Country/ies                             | Study population/s                                                                                                                                      | Total sample size | References             | Pooled prevalence of yes response [95% CI] |
|----------------------------------------------------------|-----------------------------------------|---------------------------------------------------------------------------------------------------------------------------------------------------------|-------------------|------------------------|--------------------------------------------|
| Do you know HPV?                                         | Nigeria; Senegal , Morocco , Madagascar | university staff and general population, mothers of female adolescents, students, Adolescents and young adults, parents                                 | 5,076             | (35,36,41,49,51,54,71) | 25.18 [13.31, 37.06]                       |
| Do you know that HPV can cause cervical cancer           | Nigeria, Mali                           | University students ,university staff and general population ,mothers of female adolescents ,adults and adolescents                                     | 1,379             | (35,36,41,70)          | 43.86 [19.39, 68.33]                       |
| HPV usually does not need treatment                      | South Africa                            | HIV positive and negative females                                                                                                                       | 30                | (43)                   | 97 [ 90.9241 , 103.075]                    |
| Cervical cancer is caused by persistent HPV infection    | Nigeria                                 | students                                                                                                                                                | 368               | (49)                   | 19.6 [ 15.6801 , 23.51]                    |
| A person could have HPV without knowing it?              | South Africa                            | HIV positive and negative females, university students                                                                                                  | 310               | (41,43)                | 79.92 [61.34, 98.51]                       |
| Vaccine may expose adolescents to risky sexual behaviors | Nigeria                                 | mothers of female adolescents, university students                                                                                                      | 570               | (36,41)                | 34.65 [-20.82, 90.11]                      |
| having many sexual partners increases the risk of HPV?   | South Africa, Nigeria                   | HIV positive and negative females, students                                                                                                             | 678               | (41,43,49)             | 65.64 [40.15, 91.13]                       |
| Do you know that HPV is a sexually transmitted infection | South Africa, Nigeria                   | University students ,university staff and general population , mothers of female adolescents ,HIV positive and negative females, adults and adolescents | 1,409             | (35,36,41,43,70)       | 38.16 [15.10, 61.22]                       |
| Are you aware of a vaccine for the prevention of HPV?    | Morocco, Nigeria                        | University students ,HIV positive and negative females, mothers of female adolescents, students, parents                                                | 2,548             | (35,36,41,49,54)       | 26.15 [13.36, 38.93]                       |
| Does not know where or how to access the vaccines        | Nigeria                                 | mothers of female adolescents, university students                                                                                                      | 570               | (36,41)                | 53.00 [48.98, 57.02]                       |
| The vaccine is too costly                                | Nigeria, South Africa                   | mothers of female adolescents ,HIV positive and negative females ,university students                                                                   | 600               | (36,41,43)             | 38.57 [13.65, 63.49]                       |
| Are you willing to receive the HPV vaccine?              | Senegal, Mali, Nigeria                  | students , Adolescents and young adults                                                                                                                 | 2,985             | (41,49,51,70)          | 58.54 [9.67, 107.41]                       |

402

403 **Awareness related to demographic characteristics**

404 Funmilayo and colleagues in their study of medical students awareness and vaccination acceptance

405 determined that the obstacles - as concluded by authors to receiving HPV vaccination among the

406 female respondents included inadequate information (60.9%), high cost of vaccine (56.2%), poor  
 407 access to vaccine (55.6%), worry about efficacy (38.5%), worry about safety (36.1%) and religious  
 408 barriers (17.7%). A statistically significant association was found between level of awareness and  
 409 vaccine acceptance and the level or class of students [41]. Supporting this finding; Makwe and  
 410 colleagues indicated the same association between the two variables as well [49].

411 Massey and colleagues in Senegal reported that respondents who indicated living most of their lives in  
 412 a rural area demonstrated a greater percentage of ever having heard of HPV, and that fathers'  
 413 education level is significantly associated with the willingness of HPV vaccination. Mouallif and  
 414 colleagues in Morocco concluded that mothers who agreed with the statement ‘Whatever happens to  
 415 my health is God’s will’, believed that the vaccine was expensive and believed that they had  
 416 insufficient information about the vaccine were significantly less likely to accept the vaccine [51,54].

### 417 Sexually Transmitted Infections (STIs)

418 Seven included studies assessed the awareness of 2,986 Africans in regard to STIs as general, three  
 419 studies were conducted in Nigeria [17,18,44] and one in each of Madagascar, Morocco, Mali, Uganda  
 420 [47,56,70,71]. The oldest among the study included was conducted after 2010 while the newest was  
 421 conducted in 2014. Population under study was found to be mainly adolescents and students (5/7),  
 422 while one study was targeting seafarers and another targeting women in reproductive age (Table 1).  
 423 Majority of studies were conducted among both genders (5/7), one was toward males only while  
 424 another was targeting females only (Table 1). Age of respondents range from 14 to older than 45  
 425 years. Thirty five questions were asked to the participants that are related to the knowledge and  
 426 awareness of STIs general knowledge, transmission routes, clinical symptoms, pathological  
 427 consequences and prevention attitude, among which 14 questions were analyzed and synthesized. The  
 428 question ‘‘Is Genital ulcer a symptom of having STIs?’’ was answered by 2,322 participants in  
 429 Morocco and Uganda; 23.55% [95% CI; 3.83 , 43.27] answered yes. The question ‘‘Do you know  
 430 gonorrhoea?’’ was answered by 1,123 participants in Nigeria and Madagascar; 22.84% [95% CI; 5.13 ,  
 431 40.56] answered yes. questions asked, their corresponding articles’ data, the pooled prevalence and the  
 432 confidence intervals are depicted in (Table 9). Heterogeneity was high in all questions ( $I^2$  more than  
 433 80%).

434  
 435 **Table (9):** Awareness of STIs-related knowledge among Africans

| Question                   | Country/ies | Study population/s    | Total sample size | References | Pooled prevalence of yes response [95% CI] |
|----------------------------|-------------|-----------------------|-------------------|------------|--------------------------------------------|
| Have you heard about STDs? | Nigeria     | Adolescents, Students | 881               | (17,18)    | 94.52 [89.62, 99.42]                       |



|                                                                              |                          |                                                |       |            |                          |
|------------------------------------------------------------------------------|--------------------------|------------------------------------------------|-------|------------|--------------------------|
| <b>Do you know gonorrhoea?</b>                                               | Nigeria, Madagascar      | Adolescents, Students, university students     | 1,123 | (17,18,71) | 22.84 [5.13 , 40.56]     |
| <b>Do you know syphilis?</b>                                                 | Nigeria, Madagascar      | Students, university students                  | 782   | (18,71)    | 5.67 [4.33, 7.01]        |
| <b>Do you know Herpes simplex?</b>                                           | Nigeria, Madagascar      | Students, university students                  | 782   | (18,71)    | 4.70 [1.17 , 8.23]       |
| <b>Do you know chlamydia?</b>                                                | Madagascar               | university students                            | 242   | (71)       | 1.70 [0.1320 , 3.268]    |
| <b>Can Gonorrhoea cause infertility?</b>                                     | Nigeria                  | students                                       | 30    | (44)       | 60 [42.5563 , 77.4437]   |
| <b>Is unprotected sex a mode of transmission of STIs?</b>                    | Nigeria                  | students                                       | 540   | (18)       | 87 [84.2561 , 89.7439]   |
| <b>Is Needles and syringes a mode of transmission?</b>                       | Nigeria                  | students                                       | 540   | (18)       | 82.6 [79.4641, 85.7359]  |
| <b>Is Blood and blood products a mode of transmission?</b>                   | Nigeria                  | students                                       | 540   | (18)       | 73.10 [69.3761, 76.823]  |
| <b>Is Mother to child a mode of transmission of STIs?</b>                    | Nigeria                  | students                                       | 540   | (18)       | 70.9 [67.1761, 74.623]   |
| <b>Is Coughing/sneezing a mode of transmission of STIs?</b>                  | Nigeria                  | students                                       | 540   | (18)       | 22 [18.6681, 25.3319]    |
| <b>Is Sharing plates a mode of transmission of STIs?</b>                     | Nigeria                  | students                                       | 540   | (18)       | 12.2 [9.4561, 14.243]    |
| <b>Can Gonorrhoea transmits to neonates?</b>                                 | Nigeria                  | students                                       | 30    | (44)       | 21.8 [6.5123 , 37.08]    |
| <b>Is weight loss a symptom of having STIs?</b>                              | Nigeria, Uganda          | Students, women of reproductive age            | 875   | (18,56)    | 41.44 [-28.24 , 111.11]  |
| <b>Is Painful micturition a symptom of having STIs?</b>                      | Nigeria                  | students                                       | 540   | (18)       | 68.9 [65.1761, 72.62]    |
| <b>Is Genital ulcer a symptom of having STIs?</b>                            | Nigeria, Uganda, Morocco | Students, women of reproductive age, seafarers | 2,322 | (18,47,56) | 23.55 [3.83 , 43.27]     |
| <b>Is Genital swelling a symptom of having STIs?</b>                         | Nigeria                  | students                                       | 540   | (18)       | 38.4 [ 44.1841, 52.4159] |
| <b>Is Genital discharge a symptom of having STIs?</b>                        | Nigeria, Uganda, Morocco | Students, women of reproductive age, seafarers | 2,322 | (18,47,56) | 34.98 [-0.99, 70.95]     |
| <b>Is Micturition burns a symptom of STIs in females?</b>                    | Morocco                  | seafarers                                      | 1,447 | (47)       | 6.2 [5.0240, 7.37]       |
| <b>Is Micturition burns a symptom of STIs in males?</b>                      | Morocco                  | seafarers                                      | 1,447 | (47)       | 30.2 [ 27.7480, 32.45]   |
| <b>Is Tumefaction of the groin a symptom of STIs in females?</b>             | Morocco                  | seafarers                                      | 1,447 | (47)       | 1.2 [ 0.8080, 1.56]      |
| <b>Is Tumefaction of the groin a symptom of STIs in males?</b>               | Morocco                  | seafarers                                      | 1,447 | (47)       | 35 [ 32.6480, 37.35]     |
| <b>Is Genital itching a symptom of STIs in females?</b>                      | Morocco, Uganda          | seafarers, women of reproductive age           | 1,782 | (47,56)    | 34.09 [-16.28 , 84.75]   |
| <b>Is Genital rash a symptom of STIs?</b>                                    | Uganda                   | women of reproductive age                      | 335   | (56)       | 14.5 [ 10.7761, 18.223]  |
| <b>Is painful sex a symptom of STIs?</b>                                     | Uganda                   | women of reproductive age                      | 335   | (56)       | 0.3 [ -1.4640, 2.06]     |
| <b>Can Gonorrhoea be Asymptomatic ?</b>                                      | Nigeria                  | students                                       | 30    | (44)       | 20.04 [ 5.5763, 34.58]   |
| <b>Is abstinence a possible way to prevent STDs?</b>                         | Nigeria, Uganda          | Adolescents, women of reproductive age         | 676   | (17,56)    | 23.20 [-19.23 , 85.63]   |
| <b>Is condom use a possible way to prevent STDs?</b>                         | Nigeria, Uganda          | Adolescents, women of reproductive age         | 676   | (17,56)    | 36.96 [13.44, 60.48]     |
| <b>Being faithful by having one sexual partner is a way to prevent STIs?</b> | Uganda                   | women of reproductive age                      | 335   | (56)       | 26.3 [ 21.5961 , 31.00]  |
| <b>Do you use condoms?</b>                                                   | Nigeria                  | students                                       | 30    | (44)       | 72.5 [ 56.6243, 88.37]   |
| <b>Do you reuse condoms?</b>                                                 | Nigeria                  | students                                       | 30    | (44)       | 10.1 [ -0.6798 , 20.87]  |

436

## 437 **Awareness related to demographic characteristics**

438 Akokuwebe and colleagues reported that Media (as general) was the main source of information 57%  
439 followed by friends 30%, and association between source of information about STDs is significantly  
440 related to age. Moreover, Laraqui and colleagues concluded that during the year prior to the study,  
441 73.2% of participants (seafarers) were informed about the prevention of STI/HIV/AIDS through  
442 different ways, mainly the media (73% via TV and 45.6% via radio). Amu and colleagues provided  
443 more specific information in regard to source of knowledge as they determined that there are three  
444 major sources of information; the radio and television 343 (68.7%); teachers 340 (68.1%); and  
445 newspapers 224 (44.9%). Nevertheless, Nawagi and colleagues in their study in Uganda determined  
446 that only (23.9%) of the participants have information about STIs from the media [17,47,56].

447 Joda and his colleagues in Nigeria conducted a study to assess the level of knowledge of STIs among  
448 students from different schools and concluded that there is no statistically significant differences in the  
449 responses obtained from various schools. Moreover, Reuter and colleagues conducted a study to  
450 assess the difference of STIs related knowledge between university students of Madagascar and USA,  
451 and concluded that there is no statistically significant differences as well [44,71].

452 In spite of the study populations' differences, five studies reported a significant association  
453 between knowledge of STIs and the level of education [30,38,68,81,82]. Considering age as a factor  
454 affecting the level of awareness; several studies reported it to be significantly true [38,50,65,81],  
455 while other studies reported it is not [26,59]. Moreover, living in an urban area was found to be  
456 significantly associated with awareness level in several studies [38,68,83].

457

## 458 **Discussion**

459 The current study was the first of its kind - to our knowledge, as not general assessment of knowledge  
460 is studied, but the specific awareness determinants, the presented outcomes are believed to be the best  
461 inputs for organizing effective preventive measures as well as planning and conducting awareness  
462 raising campaigns.

463 The current study highlights the specific levels of STIs-related knowledge, practices and prevention  
464 attitudes among different African populations. The pooled prevalence estimates showed that even

465 though more than 90% of the population had heard about STIs (94.52%) in general and HIV (92.24%)  
466 in particular, (79.79%) had never heard about HCV. These results are consistent with earlier studies in  
467 Eastern Europe, Victoria, Lao People's Democratic Republic and Iran [85–88]. Moreover, 25.18% of the  
468 population knows HPV. However, a study conducted among adolescents and adult women in one of  
469 the developed countries (USA) reported that only 18% had heard about the virus [89]. Nevertheless, the  
470 confounders among participants are to be considered when comparing the studies.

471 In the contrary of the expectation of HIV associated signs and symptoms awareness in such epidemic  
472 countries, this review revealed that almost only 14.4%, 17% and 17.7% of South Africans know that  
473 oral candidiasis, herpes zoster and constant diarrhea could be associated with HIV infection,  
474 respectively. Furthermore, less than 20% of the same population consider TB to be associated with  
475 AIDS [90].

476 The current findings of knowledge related to vertical HIV transmission during pregnancy 57%,  
477 delivery 66% or breastfeeding 73% corroborate with the studies of Stockholm et al (Stockholm 14)  
478 and Maimaiti et al (Maimaiti 15) although they slightly concluded higher proportions [91,92].  
479 Furthermore, these findings are in line with the results reported in UAE and Greece. Nevertheless, in  
480 India Pratibha Gupta and colleagues reported prevalence as low as 8.85% and 23.85% regarding the  
481 transmission during delivery and breastfeeding, respectively [93–95].

482 The findings clearly demonstrate that HIV preventative measures of South Africans are higher than  
483 that of Nigerians. For instance; using condom (64.46% versus 52.67%) and having one sexual partner  
484 (83.15% versus 57.67%) are known to reduce HIV transmission by South African and Nigerian  
485 populations, respectively. Bangladeshi women were reported to have knowledge similar to South  
486 Africans. However, other studies conducted in Vietnam, Italy and USA reported higher proportions  
487 [96–99].

488 It has been reported that increased HIV knowledge resulted in a reduction of risky sexual behaviors  
489 among adolescents [100]. Notably, current findings revealed that adolescents in Africa were - for some  
490 extent aware of the facts associated with epidemics, transmission and prevention of HIV infection.  
491 Approximately 60.75% think that a healthy person can be HIV infected, similar finding was reported  
492 among Russians as well. Nevertheless, higher proportions were found to be reported in Iran and USA  
493 [101–103]. More than 50% were found to be of good knowledge level about HIV transmission through  
494 Sexual intercourse (67.81%, Sharing sharp unsterilized objects (54.27%) and using intravenous  
495 needles (53.32%). This knowledge is higher when compared to Southern Brazilian adolescent's.

496 However, adolescents from India, US, Lao People's Democratic Republic and Iraq were reported to  
497 possess higher knowledge scores [86,97,104–106].

498 Despite the finding that most of adolescents in Africa are aware of the correct ways of HIV  
499 transmission, they still express extensive misconceptions; nearly the half believe that HIV could be  
500 contracted through mosquitoes (43.54%), through toilet seats(43.79%), sharing cups/plates (33.51%)  
501 and through hugging or kissing (25.83%). Studies carried out among nursing students in Greece and  
502 among men who have sex with men in Finland illustrate similar findings as well. However, higher  
503 proportions (76%) for kissing and (100%) for sharing dishes, hot springs, kissing and mosquito bites  
504 were reported in Taiwan and Japan, respectively [95,107–109].

505 HIV-related stigma and discrimination persist as major obstacles to an effective HIV response in all  
506 parts of the world. Almost 37.4% of South Africans consider stigma is a barrier to HIV testing.  
507 Generally speaking, Africans' attitudes towards HIV/AIDS patients were in need for enforcement. For  
508 example, 62.95% would care for a relative with HIV in household, 57.11% would buy vegetables  
509 from an HIV infected vendor, and only 44.80% would allow a person with HIV to teach. Similar  
510 results were found to be reported in Sri Lanka. However, Janahi and colleagues in their findings  
511 reported that more than half of the adult participants (n=1,630) in Bahrain would avoid sitting near,  
512 hugging or even shaking HIV infected people hands [110–112].

513 The findings presented in this study regarding HBV illustrate that the knowledge of Africans is  
514 moderate, i.e. 61.43% know about the consequence of liver damage. Moreover, reusing needles  
515 52.72%, sexual contact 42.58% and toothbrush sharing 49% were considered to be possible routs of  
516 HBV transmission. Furthermore, 72.36% correctly believe in the existence of vaccination. A prior  
517 study conducted among Asian Americans in USA reported similar or slightly higher knowledge [113].

518 Regarding HCV, about 68.82% of Africans have correct knowledge about its transmission through  
519 reusing needles. However, nearly the half (42.05%) incorrectly believe in the existence of vaccination.  
520 Taiwanese dental students also believe that there is an effective vaccine for HCV but in a proportion  
521 as low as 15% [107].

522 The pooled prevalence of the African knowledge regarding the association between HPV and cervical  
523 cancer was found to be mostly 43.86%, this is consistent with a study conducted in USA. Moreover,  
524 nearly 26.15% of South Africans were aware of a vaccine for HPV prevention, lower prevalence  
525 (10.8%, N=1,177) was reported in Berlin, Germany recently (2018). However, the fact that the later

526 study was conducted among students and young adults is needed to considered when comparing the  
527 results. [114,115].

528 Implementation of educational awareness programs in schools will have its impacts in the near future.  
529 Moreover, knowledge raising campaigns at the continent level or nationally, in urban and rural regions  
530 targeting infected or non infected individuals using traditional sittings or integrating new online tools  
531 is needed to be applied, for raising awareness, increasing willingness for testing, decreasing STIs  
532 transmission and decreasing stigma and discriminations.

### 533 **Strengths and Limitations**

534 The strengths of this review are that we systematically identified and included awareness estimates  
535 from 2010, Moreover, we have conducted meta-analysis to derive pooled prevalence estimates of all  
536 questions related. Furthermore, we carried out a quality assessment of the included studies based on  
537 criteria specifically developed to determine the quality of included studies.

538 Nevertheless, several limitations are to be considered when interpreting study results; grey literature  
539 evidence was not assessed. Moreover, African journals that are not indexed in the screened databases  
540 was not considered for inclusion as well, although all included studies are of good quality, several  
541 good studies might have be missed. Furthermore, another parameter that should be considered is that  
542 the limited number of participants in some questions can be observed for which the outcome might  
543 not be suitable to be generalized to the continent/country/population level. Lastly, the heterogeneity  
544 was high among the majority of questions analyzed.

### 545 **Conclusion**

546 The current study indicates that awareness is needed to be enforced. The differences observed among  
547 populations are highlighting the possibility for containment and control by directing light toward  
548 specific populations or countries as well as addressing specific awareness knowledge to ensure that  
549 the general as well as the related specific preventive awareness knowledge is improved.

### 550 **Authors' contribution**

551 Designed the experiments: BMM and AMS. Performed the experiments: All authors. Analyzed the  
552 data: BMM. Wrote the paper: BMM, AMS and OWM. All authors read and approved the final  
553 article.

### 554 **Grant information**

555 Authors declared that no grants were involved in supporting this work.

## 556 **Conflict of interests**

557 Authors declare they have no competing interests; financial or others.

558

## 559 **References**

- 560 1. Thomas R. Eng and William T. Butler. *The Hidden Epidemic: Confronting Sexually*  
561 *Transmitted Diseases*. Committee on Prevention and Control of Sexually Transmitted Diseases,  
562 Institute of Medicine: The National Academies; 1997. 448 p.
- 563 2. UNAIDS. Fact sheet - Latest statistics on the status of the AIDS epidemic. 2018.  
564 Available at: <http://www.unaids.org/en/resources/fact-sheet>.
- 565 3. UNAIDS. *Global Report: UNAIDS Report on the Global AIDS Epidemic 2010*. 2010.  
566 [http://data.unaids.org/pub/Report/2009/JC1700\\_Epi\\_Update\\_2009\\_en.pdf](http://data.unaids.org/pub/Report/2009/JC1700_Epi_Update_2009_en.pdf) (accessed 9 Jan  
567 2019).
- 568 4. Laia Bruni, Mireia Diaz, Xavier Castellsague', Elena Ferrer, F. Xavier Bosch and S de  
569 S. *Cervical Human Papillomavirus Prevalence in 5 Continents: Meta-Analysis of 1 Million*  
570 *Women with Normal Cytological Finding*. *J Infect Dis*. 2010;202:1789–99.
- 571 5. World Health Organization. *Hepatitis B*. Fact sheet No. 204. WHO; 2018. Available at:  
572 <http://www.who.int/mediacentre/factsheets/fs204/en/> (Accessed Jan 2019).
- 573 6. World Health Organization. *Hepatitis C*. Fact sheet No. 164. WHO; 2018. Available at:  
574 <http://www.who.int/mediacentre/factsheets/fs164/en/> (Accessed Jan 2019).
- 575 7. “Despite Global Slowdown, African Economies Growing Strongly— New Oil, Gas, and  
576 Mineral Wealth an Opportunity for Inclusive Development”. World Bank. 2012. Retrieved Jan  
577 2019.
- 578 8. Chan BT, Tsai AC. HIV knowledge trends during an era of rapid antiretroviral therapy  
579 scale-up: an analysis of 33 sub-Saharan African countries. *J Int AIDS Soc* [Internet]. 2018  
580 Jul;21(7):e25169. Available from: <http://doi.wiley.com/10.1002/jia2.25169>
- 581 9. Moher D, Liberati A, Tetzlaff J, Altman DG, The PRISMA Group (2009). Preferred  
582 Reporting Items for Systematic Reviews and Meta-Analyses: The PRISMA Statement. *PLoS*  
583 *Med* 6(7): e1000097.
- 584 10. Thomas C. Chalmers, HarrySmith Jr, Bradley Blackburn, Bernard Silverman, Biruta  
585 Schroeder, Dinah Reitman, Alexander Ambroz. A method for assessing the quality of a  
586 randomized control trial. *Control Clin Trials*. 1981; 2(1): 31–49.
- 587 11. Duval, S. and Tweedie, R. Trim and Fill: A Simple Funnel-Plot–Based Method of  
588 Testing and Adjusting for Publication Bias in Meta-Analysis. *Biometrics*. 2000;56: 455-463.
- 589 12. Abdulai MA, Baiden F, Adjei G, Owusu-Agyei S. Low level of Hepatitis B knowledge

- 590 and awareness among pregnant women in the Kintampo North Municipality: implications for  
591 effective disease control. *Ghana Med J*. 2016 Sep;50(3):157–62.
- 592 13. Abimanyi-Ochom J, Mannan H, Groce NE, McVeigh J. HIV/AIDS knowledge, attitudes  
593 and behaviour of persons with and without disabilities from the Uganda Demographic and  
594 Health Survey 2011: Differential access to HIV/AIDS information and services. Federici S,  
595 editor. *PLoS One* [Internet]. 2017 Apr 13;12(4):e0174877. Available from:  
596 <https://dx.plos.org/10.1371/journal.pone.0174877>
- 597 14. Aderemi TJ, Pillay BJ. Sexual abstinence and HIV knowledge in school-going  
598 adolescents with intellectual disabilities and non-disabled adolescents in Nigeria. *J Child*  
599 *Adolesc Ment Heal* [Internet]. 2013 Dec;25(2):161–74. Available from:  
600 <http://www.tandfonline.com/doi/abs/10.2989/17280583.2013.823867>
- 601 15. Adoba P, Boadu SK, Agbodzakey H, Somuah D, Ephraim RKD, Odame EA. High  
602 prevalence of hepatitis B and poor knowledge on hepatitis B and C viral infections among  
603 barbers: a cross-sectional study of the Obuasi municipality, Ghana. *BMC Public Health*  
604 [Internet]. 2015 Dec 11;15(1):1041. Available from:  
605 <http://bmcpublikealth.biomedcentral.com/articles/10.1186/s12889-015-2389-7>
- 606 16. Ajide KB, Balogun FM. Knowledge of HIV and Intention to Engage in Risky Sexual  
607 Behaviour and Practices among Senior School Adolescents in Ibadan, Nigeria. *Arch basic Appl*  
608 *Med* [Internet]. 2018 Feb [cited 2018 Dec 3];6(1):3–8. Available from:  
609 <http://www.ncbi.nlm.nih.gov/pubmed/30294661>
- 610 17. Akokuwebe ME, Daini B, Falayi EO, Oyebade O. Knowledge and attitude of sexually  
611 transmitted diseases among adolescents in Ikeji-Arakeji, Osun State, in South-Western Nigeria.  
612 *Afr J Med Med Sci*. 2016 Sep;45(3):281–9.
- 613 18. Amu EO, Adegun PT. Awareness and Knowledge of Sexually Transmitted Infections  
614 among Secondary School Adolescents in Ado Ekiti, South Western Nigeria. *J Sex Transm Dis*  
615 [Internet]. 2015;2015:1–7. Available from: <https://www.hindawi.com/archive/2015/260126/>
- 616 19. Appiah-Agyekum NN, Suapim. Knowledge and awareness of HIV/AIDS among high  
617 school girls in Ghana. *HIV/AIDS - Res Palliat Care* [Internet]. 2013 Jul;5:137. Available from:  
618 <http://www.dovepress.com/knowledge-and-awareness-of-hiv-aids-among-high-school-girls-in-ghana-peer-reviewed-article-HIV>
- 620 20. Aroke D, Kadia BM, Anutebeh EN, Belanquale CA, Misori GM, Awa A, et al.  
621 Awareness and Vaccine Coverage of Hepatitis B among Cameroonian Medical Students.  
622 *Biomed Res Int* [Internet]. 2018 Sep 25;2018:1–6. Available from:  
623 <https://www.hindawi.com/journals/bmri/2018/3673289/>
- 624 21. Asefa A, Beyene H. Awareness and knowledge on timing of mother-to-child  
625 transmission of HIV among antenatal care attending women in Southern Ethiopia: a cross  
626 sectional study. *Reprod Health* [Internet]. 2013 Dec 13;10(1):66. Available from:  
627 <http://reproductive-health-journal.biomedcentral.com/articles/10.1186/1742-4755-10-66>
- 628 22. Audet CM, Sidat M, Blevins M, Moon TD, Vergara A, Vermund SH. HIV knowledge  
629 and health-seeking behavior in Zambézia Province, Mozambique. *SAHARA-J J Soc Asp*  
630 *HIV/AIDS* [Internet]. 2012 Mar;9(1):41–6. Available from:  
631 <http://www.tandfonline.com/doi/abs/10.1080/17290376.2012.665257>

- 632 23. Azodo C, Omili M, Akeredolu P. Nigerian dental technology students and human  
633 immunodeficiency virus infection: Knowledge, misconceptions and willingness to care. *Ann*  
634 *Med Health Sci Res* [Internet]. 2014 May [cited 2018 Dec 3];4(3):330. Available from:  
635 <http://www.amhsr.org/text.asp?2014/4/3/330/133454>
- 636 24. Becker E, Kuo C, Operario D, Moshabela M, Cluver L. Measuring child awareness for  
637 adult symptomatic HIV using a verbal assessment tool: concordance between adult-child dyads  
638 on adult HIV-associated symptoms and illnesses. *Sex Transm Infect* [Internet]. 2015  
639 Nov;91(7):528–33. Available from: [http://sti.bmj.com/lookup/doi/10.1136/sextrans-2014-](http://sti.bmj.com/lookup/doi/10.1136/sextrans-2014-051728)  
640 051728
- 641 25. Carlos S, Martínez-González MÁ, Burgueño E, López-del Burgo C, Ruíz-Canela M,  
642 Ndarabu A, et al. Misconceptions about HIV infection in Kinshasa (Democratic Republic of  
643 Congo): a case-control study on knowledge, attitudes and practices: Table 1. *Sex Transm Infect*  
644 [Internet]. 2015 Aug;91(5):334–7. Available from:  
645 <http://sti.bmj.com/lookup/doi/10.1136/sextrans-2014-051734>
- 646 26. Chaquisse E, Meireles P, Fraga S, Mbofana F, Barros H. Knowledge about HIV, HBV  
647 and HCV modes of transmission among pregnant women in Nampula - Mozambique. *AIDS*  
648 *Care*. 2018 Sep;30(9):1161–7.
- 649 27. Chard AN, Metheny N, Stephenson R. Perceptions of HIV Seriousness, Risk, and  
650 Threat Among Online Samples of HIV-Negative Men Who Have Sex With Men in Seven  
651 Countries. *JMIR public Heal Surveill*. 2017 Jun;3(2):e37.
- 652 28. Cheng A, Jose J, Larsen-Reindorf R, Small C, Nde H, Dugas L, et al. A Survey Study of  
653 Pregnant Women and Healthcare Practitioners Assessing the Knowledge of Attitudes and  
654 Practices of Hepatitis B Management at a Teaching Hospital in Kumasi, Ghana, West Africa.  
655 *Open forum Infect Dis*. 2015 Dec;2(4):ofv122.
- 656 29. Chimoyi L, Tshuma N, Muloongo K, Setswe G, Sarfo B, Nyasulu PS. HIV-related  
657 knowledge, perceptions, attitudes, and utilisation of HIV counselling and testing: a venue-based  
658 intercept commuter population survey in the inner city of Johannesburg, South Africa. *Glob*  
659 *Health Action*. 2015;8:26950.
- 660 30. Ciampa PJ, Skinner SL, Patricio SR, Rothman RL, Vermund SH, Audet CM.  
661 Comprehensive knowledge of HIV among women in rural Mozambique: development and  
662 validation of the HIV knowledge 27 scale. *PLoS One*. 2012;7(10):e48676.
- 663 31. Darteh EKM, Kumi-Kyereme A, Awusabo-Asare K. Perception of Risk of HIV among  
664 Adolescents' Living in an Urban Slum in Ghana. *Afr J Reprod Health*. 2016 Mar;20(1):62–70.
- 665 32. Demsiss W, Seid A, Fiseha T. Hepatitis B and C: Seroprevalence, knowledge, practice  
666 and associated factors among medicine and health science students in Northeast Ethiopia. *PLoS*  
667 *One*. 2018;13(5):e0196539.
- 668 33. Elbadawi A, Mirghani H. Assessment of HIV/AIDS comprehensive correct knowledge  
669 among Sudanese university: a cross-sectional analytic study 2014. *Pan Afr Med J*. 2016;24:48.
- 670 34. Engelbrecht JG, Letsoalo MR, Chirowodza AC. An assessment of the HIV/TB  
671 knowledge and skills of home-based carers working in the North West province in South  
672 Africa: a cross-sectional study. *BMC Health Serv Res*. 2017 Apr;17(1):285.



- 673 35. Eni AO, Soluade MG, Efekemo OP, Igwe TT, Onile-Ere OA. Poor Knowledge of  
674 Human Papilloma Virus and Vaccination Among Respondents from Three Nigerian States. *J*  
675 *Community Health*. 2018 Jun;
- 676 36. Ezenwa BN, Balogun MR, Okafor IP. Mothers' human papilloma virus knowledge and  
677 willingness to vaccinate their adolescent daughters in Lagos, Nigeria. *Int J Womens Health*.  
678 2013;5:371–7.
- 679 37. Faleye A. Knowledge of HIV and benefits of male medical circumcision amongst clients  
680 in an urban area. *African J Prim Heal care Fam Med*. 2014 Dec;6(1):E1-5.
- 681 38. Faust L, Yaya S, Ekholuenetale M. Wealth inequality as a predictor of HIV-related  
682 knowledge in Nigeria. *BMJ Glob Heal*. 2017;2(4):e000461.
- 683 39. Faye A, Faye MD, Leye MM, Seck I, Tal-Dia A. Knowledge and attitudes of Senegalese  
684 sailors about HIV/AIDS. *Int Marit Health*. 2013;64(3):148–53.
- 685 40. Frambo AAB, Atashili J, Fon PN, Ndumbe PM. Prevalence of HBsAg and knowledge  
686 about hepatitis B in pregnancy in the Buea Health District, Cameroon: a cross-sectional study.  
687 *BMC Res Notes*. 2014 Jun;7:394.
- 688 41. Funmilayo F. Adejuyigbe, Balogun R. Balogun, Sekoni, Adekemi and AAA. Cervical  
689 Cancer and Human Papilloma Virus Knowledge and Acceptance of Vaccination among  
690 Medical Students in Southwest Nigeria Cervical Cancer and Human Papilloma Virus  
691 Knowledge and Acceptance of Vaccination among Medical Students in Southwest Nigeria.  
692 2018;(March 2015).
- 693 42. George G, Chitindingu E, Gow J. Evaluating traditional healers knowledge and practices  
694 related to HIV testing and treatment in South Africa. *BMC Int Health Hum Rights*. 2013  
695 Oct;13:45.
- 696 43. Griffith DC, Adler D, Wallace M, Bennie T, Abar B, Bekker L-G. Knowledge of HPV  
697 among HIV-Infected and HIV-Uninfected Adolescent Women in South Africa. *J women's Heal*  
698 *issues care*. 2015;4(5).
- 699 44. Joda AE, Tayo F, Aina BA. Undergraduate Students' Knowledge and Practice of  
700 Gonorrhoea and other Sexually Transmitted Infections Undergraduate Students' Knowledge and  
701 Practice of Gonorrhoea and other Sexually Transmitted Infections. *Nig Q J Hosp Med*.  
702 2013;23(4):302–8.
- 703 45. Kiderlen TR, Conteh M, Roll S, Seeling S, Weinmann S. Cross-sectional study  
704 assessing HIV-related knowledge, attitudes and behavior in the Namibian truck transport sector:  
705 Readjusting HIV prevention programs in the workplace. *J Infect Public Health*. 2015;8(4):346–  
706 54.
- 707 46. Kufa T, Maseko VD, Nhlapo D, Radebe F, Puren A, Kularatne RS. Knowledge of HIV  
708 status and antiretroviral therapy use among sexually transmitted infections service attendees and  
709 the case for improving the integration of services in South Africa: A cross sectional study.  
710 *Medicine (Baltimore)*. 2018 Sep;97(39):e12575.
- 711 47. Laraqui S, Laraqui O, Manar N, Ghailan T, Belabsir M, Deschamps F, et al. The  
712 assessment of seafarers' knowledge, attitudes and practices related to STI/HIV/AIDS in  
713 northern Morocco. *Int Marit Health*. 2017;68(1):26–30.

- 714 48. Lawan UM, Abubakar S, Ahmed A. Risk perceptions, prevention and treatment seeking  
715 for sexually transmitted infections and HIV/AIDS among female sex workers in Kano, Nigeria.  
716 *Afr J Reprod Health*. 2012;16(March):61–8.
- 717 49. Makwe CC, Anorlu RI, Odeyemi KA. Human papillomavirus (HPV) infection and  
718 vaccines: knowledge, attitude and perception among female students at the University of Lagos,  
719 Lagos, Nigeria. *J Epidemiol Glob Health*. 2012 Dec;2(4):199–206.
- 720 50. Mason K, Ketende S, Peitzmeier S, Ceesay N, Diouf D, Loum J, et al. A cross-sectional  
721 analysis of population demographics, HIV knowledge and risk behaviors, and prevalence and  
722 associations of HIV among men who have sex with men in the Gambia. *AIDS Res Hum*  
723 *Retroviruses*. 2013 Dec;29(12):1547–52.
- 724 51. Massey PM, Boansi RK, Gipson JD, Adams RM, Riess H, Dieng T. Human  
725 papillomavirus (HPV) awareness and vaccine receptivity among Senegalese adolescents. *Trop*  
726 *Med Int Health*. 2017;22(1):113–21.
- 727 52. Mesfin YM, Kibret KT. Assessment of Knowledge and Practice towards Hepatitis B  
728 among Medical and Health Science Students in Haramaya University, Ethiopia. Schildgen O,  
729 editor. *PLoS One* [Internet]. 2013 Nov 21;8(11):e79642. Available from:  
730 <https://dx.plos.org/10.1371/journal.pone.0079642>
- 731 53. Mkumbo K. Assessment of HIV/AIDS knowledge, attitudes and behaviours among  
732 students in higher education in Tanzania. *Glob Public Health* [Internet]. 2013 Dec  
733 2;8(10):1168–79. Available from:  
734 <http://www.tandfonline.com/doi/full/10.1080/17441692.2013.837498>
- 735 54. Mouallif M, Bowyer HL, Festali S, Albert A, Filali-Zegzouti Y, Guenin S, et al.  
736 Cervical cancer and HPV: Awareness and vaccine acceptability among parents in Morocco.  
737 *Vaccine* [Internet]. 2014 Jan;32(3):409–16. Available from:  
738 <https://linkinghub.elsevier.com/retrieve/pii/S0264410X13014655>
- 739 55. Nabukenya AM, Matovu JKB. Correlates of HIV status awareness among older adults  
740 in Uganda: results from a nationally representative survey. *BMC Public Health*. 2018  
741 Sep;18(1):1128.
- 742 56. Nawagi F, Mpimbaza A, Mukisa J, Serwadda P, Kyalema S, Kizza D. Knowledge and  
743 practices related to sexually transmitted infections among women of reproductive age living in  
744 Katanga slum, Kampala, Uganda. *Afr Health Sci*. 2016 Mar;16(1):116–22.
- 745 57. Ngaira JAM, Kimotho J, Mirigi I, Osman S, Ng'ang'a Z, Lwembe R, et al. Prevalence,  
746 awareness and risk factors associated with Hepatitis B infection among pregnant women  
747 attending the antenatal clinic at Mbagathi District Hospital in Nairobi, Kenya. *Pan Afr Med J*.  
748 2016;24:315.
- 749 58. Noubiap JJN, Nansseu JRN, Kengne KK, Tchokfe Ndoula S, Agyingi LA. Occupational  
750 exposure to blood, hepatitis B vaccine knowledge and uptake among medical students in  
751 Cameroon. *BMC Med Educ* [Internet]. 2013 Dec 8 [cited 2018 Dec 3];13(1):148. Available  
752 from: <http://bmcmededuc.biomedcentral.com/articles/10.1186/1472-6920-13-148>
- 753 59. Nubed CK, Akoachere J-FTK. Knowledge, attitudes and practices regarding HIV/AIDS  
754 among senior secondary school students in Fako Division, South West Region, Cameroon.  
755 *BMC Public Health*. 2016 Aug;16(1):847.

- 756 60. Ojiejabu WA, Femi-Oyewo MN, Eze UI. HIV/AIDS Knowledge, Attitude and Risk  
757 Perception among Pregnant Women in a Teaching Hospital, Southwestern Nigeria. *J basic Clin*  
758 *Pharm.* 2011 Sep;2(4):185–98.
- 759 61. Okonkwo UC, Ngim OE, Osim H, Inyama MA, Esu MK-AE, Ndoma-Egba R, et al.  
760 Knowledge of hepatitis B virus infection among traders. *Niger J Clin Pract.* 2017  
761 Apr;20(4):415–20.
- 762 62. Okonkwo U, Otu A, Ameh S, Okpara H. Public Awareness of Hepatitis B Virus  
763 Infection in Cross River State, Nigeria: A Population-Based Survey. *West Afr J Med [Internet].*  
764 2018;35(2):79–84. Available from: <http://www.ncbi.nlm.nih.gov/pubmed/30027991>
- 765 63. Oladepo O, Fayemi MM. Perceptions about sexual abstinence and knowledge of  
766 HIV/AIDS prevention among in-school adolescents in a western Nigerian city. *BMC Public*  
767 *Health [Internet].* 2011 May 12 [cited 2018 Dec 3];11(1):304. Available from:  
768 <http://bmcpublichealth.biomedcentral.com/articles/10.1186/1471-2458-11-304>
- 769 64. Omotowo IB, Meka IA, Ijoma UN, Okoli VE, Obienu O, Nwagha T, et al. Uptake of  
770 hepatitis B vaccination and its determinants among health care workers in a tertiary health  
771 facility in Enugu, South-East, Nigeria. *BMC Infect Dis [Internet].* 2018 Dec 28;18(1):288.  
772 Available from: <https://bmcinfectdis.biomedcentral.com/articles/10.1186/s12879-018-3191-9>
- 773 65. Oppong A, Oti-Boadi M. HIV/AIDS knowledge among undergraduate university  
774 students: implications for health education programs in Ghana. *Afr Health Sci [Internet].* 2013  
775 Sep 5;13(2):270–7. Available from: <http://www.ajol.info/index.php/ahs/article/view/93478>
- 776 66. Owusu SA. “Over my Dead Body”: Knowledge and Attitude of Children towards HIV  
777 and AIDS in the Cape Coast Metropolis of Ghana. *Afr J Reprod Health.* 2015 Mar;19(1):63–72.
- 778 67. Oyekale AS. Assessment of sex-related behaviours, human immunodeficiency virus  
779 (HIV) knowledge and sexually transmitted infections (STIs) among men of reproductive age in  
780 Cameroon. *Int J Environ Res Public Health.* 2014 Dec;11(12):12726–38.
- 781 68. Paintsil E, Renner L, Antwi S, Dame J, Enimil A, Ofori-Atta A, et al. HIV knowledge,  
782 stigma, and illness beliefs among pediatric caregivers in Ghana who have not disclosed their  
783 child’s HIV status. *AIDS Care [Internet].* 2015 Nov 2 [cited 2018 Dec 3];27(sup1):18–27.  
784 Available from: <https://www.tandfonline.com/doi/full/10.1080/09540121.2015.1007116>
- 785 69. Pathmanathan I, Lederer P, Shiraishi RW, Wadonda-Kabondo N, Date A, Matatiyo B, et  
786 al. Knowledge of Human Immunodeficiency Virus Status and Seropositivity After a Recently  
787 Negative Test in Malawi. *Open forum Infect Dis.* 2017;4(1):ofw231.
- 788 70. Poole DN, Tracy JK, Levitz L, Rochas M, Sangare K, Yekta S, et al. A cross-sectional  
789 study to assess HPV knowledge and HPV vaccine acceptability in Mali. *PLoS One.*  
790 2013;8(2):e56402.
- 791 71. Reuter PR, McGinnis S, Reuter KE. Comparing the awareness of and beliefs in sexually  
792 transmitted infections among university students in Madagascar and the United States of  
793 America. *PeerJ.* 2018;6:e4362.
- 794 72. Rukundo A, Muwonge MM, Mugisha D, Aturwanaho D, Kasangaki A, Bbosa GS.  
795 Knowledge, Attitudes and Perceptions of Secondary School Teenagers towards HIV  
796 Transmission and Prevention in Rural and Urban Areas of Central Uganda. *Health (Irvine*

- 797 Calif). 2016;8(10).
- 798 73. Sahile Z, Mekuria M, Yared A. Comprehensive HIV/AIDS Knowledge and Sexual  
799 Behavior among University Students in Ambo, Central Ethiopia: Implication to Improve  
800 Intervention. *J Sex Transm Dis*. 2015;2015:890202.
- 801 74. Saleh WF, Gamaleldin SF, Abdelmoty HI, Raslan AN, Fouda UM, Mohesen MN, et al.  
802 Reproductive health and HIV awareness among newly married Egyptian couples without formal  
803 education. *Int J Gynaecol Obstet*. 2014 Sep;126(3):209–12.
- 804 75. Sandqvist J, Wahlberg J, Muhumuza E, Andersson R. HIV Awareness and Risk  
805 Behavior among Pregnant Women in Mateete, Uganda (2010). *ISRN Obstet Gynecol*.  
806 2011;2011:709784.
- 807 76. Schwitters A, Sabatier J, Seth P, Glenshaw M, Remmert D, Pathak S, et al. HIV and  
808 alcohol knowledge, self-perceived risk for HIV, and risky sexual behavior among young HIV-  
809 negative men identified as harmful or hazardous drinkers in Katutura, Namibia. *BMC Public*  
810 *Health*. 2015 Nov;15:1182.
- 811 77. Seyoum A, Legesse M. Knowledge of tuberculosis (TB) and human immunodeficiency  
812 virus (HIV) and perception about provider initiated HIV testing and counselling among TB  
813 patients attending health facilities in Harar town, Eastern Ethiopia. *BMC Public Health*. 2013  
814 Feb;13:124.
- 815 78. Shiferaw Y, Alemu A, Assefa A, Tesfaye B, Gibermedhin E, Amare M. Perception of  
816 risk of HIV and sexual risk behaviors among University students: implication for planning  
817 interventions. *BMC Res Notes* [Internet]. 2014 [cited 2018 Dec 3];7(1):162. Available from:  
818 <http://bmresnotes.biomedcentral.com/articles/10.1186/1756-0500-7-162>
- 819 79. Sultan NY, YacoobMayet A, Alaqeel SA, Al-Omar HA. Assessing the level of  
820 knowledge and available sources of information about hepatitis C infection among HCV-  
821 infected Egyptians. *BMC Public Health*. 2018 Jun;18(1):747.
- 822 80. Tarekegne M, Adera A, Haile K, Guyo D. Knowledge, attitude, and practice of  
823 HIV/AIDS among workers at China first highway engineering Company at Bilibila Sokota  
824 Road Project, Sokota, Ethiopia. *Hum Antibodies* [Internet]. 2018 Feb 5 [cited 2018 Dec  
825 3];26(2):63–73. Available from:  
826 <http://www.medra.org/servlet/aliasResolver?alias=iospress&doi=10.3233/HAB-170322>
- 827 81. Umar SA, Oche OM. Knowledge of HIV/AIDS and use of mandatory premarital HIV  
828 testing as a prerequisite for marriages among religious leaders in Sokoto, North Western  
829 Nigeria. *Pan Afr Med J*. 2012;11:27.
- 830 82. Wagenaar BH, Sullivan PS, Stephenson R. Correction: HIV Knowledge and Associated  
831 Factors among Internet-Using Men Who Have Sex with Men (MSM) in South Africa and the  
832 United States. Lama JR, editor. *PLoS One* [Internet]. 2012 Jul 10 [cited 2018 Dec 3];7(7).  
833 Available from: [https://dx.plos.org/10.1371/annotation/7910bc43-9371-4ad5-aa5d-](https://dx.plos.org/10.1371/annotation/7910bc43-9371-4ad5-aa5d-900161daf089)  
834 [900161daf089](https://dx.plos.org/10.1371/annotation/7910bc43-9371-4ad5-aa5d-900161daf089)
- 835 83. Yaya S, Ghose B, Udenigwe O, Shah V, Hudani A, Ekholuenetale M. Knowledge and  
836 attitude of HIV/AIDS among women in Nigeria: a cross-sectional study. *Eur J Public Health*  
837 [Internet]. 2018 Jul 19 [cited 2018 Dec 3]; Available from:  
838 <https://academic.oup.com/eurpub/advance-article/doi/10.1093/eurpub/cky131/5056174>

- 839 84. Zungu NP, Simbayi LC, Mabaso M, Evans M, Zuma K, Ncitakalo N, et al. HIV risk  
840 perception and behavior among medically and traditionally circumcised males in South Africa.  
841 BMC Public Health. 2016 Apr;16:357.
- 842 85. Giles M, Garland S. A study of women's knowledge regarding human papillomavirus  
843 infection, cervical cancer and human papillomavirus vaccines. Aust New Zeal J Obstet  
844 Gynaecol. 2006;46(4):311–5.
- 845 86. Thanavanh B, Harun-Or-Rashid M, Kasuya H, Sakamoto J. Knowledge, attitudes and  
846 practices regarding HIV/AIDS among male high school students in Lao People's Democratic  
847 Republic. J Int AIDS Soc. 2013;16:1–7.
- 848 87. Zarei E, Khabiri R, Tajvar M, Nosratnejad S. Knowledge of and attitudes toward  
849 HIV/AIDS among Iranian women. Epidemiol Health [Internet]. 2018;40(September):e2018037.  
850 Available from: <http://e-epih.org/journal/view.php?doi=10.4178/epih.e2018037>
- 851 88. UNICEF. Knowledge of HIV/AIDS Transmission and Prevention: Eastern Europe and  
852 Eurasia: A Comparative Report. 2002.
- 853 89. Mays RM, Zimet GD, Winston Y, Kee R, Dickes J, Su L. Human papillomavirus,  
854 genital warts, pap smears, and cervical cancer: Knowledge and beliefs of adolescent and adult  
855 women. Health Care Women Int. 2000;21(5):361–74.
- 856 90. United Nations Joint Programme on HIV/AIDS (UNAIDS). UNAIDS DATA 2018  
857 [Internet]. 2018. Available from: [http://www.unaids.org/sites/default/files/media\\_asset/unaids-  
858 data-2018\\_en.pdf](http://www.unaids.org/sites/default/files/media_asset/unaids-data-2018_en.pdf)
- 859 91. Tadese A, Menasbo B. Knowledge , attitude and practice regarding HIV / AIDS among  
860 secondary school students in in Mekelle City, Ethiopia. African J AIDS HIV Res. 2013;1(1):1–  
861 7.
- 862 92. Rudén M. HIV-knowledge and Attitudes in Swedish Nursing Homes. Södertörn; 2018.
- 863 93. Gupta P, Anjum F, Bhardwaj P, Srivastav JP, Zaidi ZH. Knowledge about HIV/AIDS  
864 among secondary school students. N Am J Med Sci. 2013;5(2):119–23.
- 865 94. Haroun D, El Saleh O, Wood L, Mechli R, Al Marzouqi N, Anouti S. Assessing  
866 knowledge of, and attitudes to, HIV/AIDS among university students in the United Arab  
867 Emirates. PLoS One. 2016;11(2):1–11.
- 868 95. Nawafleh HA, Al-Maghaireh SA-SAZDF. Ealth cience ournal ®. Heal Sci J.  
869 2012;6(2):773–83.
- 870 96. Yaya S, Bishwajit G, Danhoundo G, Shah V, Ekholuenetale M. Trends and  
871 determinants of HIV/AIDS knowledge among women in Bangladesh. BMC Public Health  
872 [Internet]. 2016;16(1):1–9. Available from: <http://dx.doi.org/10.1186/s12889-016-3512-0>
- 873 97. Tung WC, Lu M, Cook DM. HIV/AIDS knowledge and attitudes among chinese college  
874 students in the US. J Immigr Minor Heal. 2013;15(4):788–95.
- 875 98. Hoang D, Dinh AT, Groce N, Sullivan LE. Knowledge and perceptions of HIV-infected  
876 patients regarding HIV transmission and treatment in Ho Chi Minh City, Vietnam. Asia-Pacific  
877 J Public Heal. 2015;27(2):NP746-NP757.

- 878 99. Di Giuseppe G, Sessa A, Mollo S, Corbisiero N, Angelillo IF. Knowledge, attitudes, and  
879 behaviors regarding HIV among first time attenders of voluntary counseling and testing services  
880 in Italy. *BMC Infect Dis.* 2013;13(1).
- 881 100. Pharr JR, Enejoh V, O. Mavegam B, Olutola A, Karick H, E. Ezeanolue E. A Cross-  
882 Sectional Study of the Role of HIV/AIDS Knowledge in Risky Sexual Behaviors of  
883 Adolescents in Nigeria. *Int J High Risk Behav Addict [Internet].* 2017;6(4):1–6. Available  
884 from: <http://jhrba.com/en/articles/63203.html>
- 885 101. Inungu J, Mumford V, Younis M, Inungu J, Mumford V, Langford S. SPAEF HIV  
886 KNOWLEDGE , ATTITUDES AND PRACTICES AMONG COLLEGE STUDENTS IN THE  
887 UNITED STATES. *JSTOR.* 2018;
- 888 102. Benotsch EG, Pinkerton SD, Dyatlov R V., DiFranceisco W, Smirnova TS, Swain GR,  
889 et al. A comparison of HIV/AIDS knowledge and attitudes of STD clinic clients in St.  
890 Petersburg, Russia and Milwaukee, WI, USA. *J Community Health.* 2004;29(6):451–65.
- 891 103. Hasani L, Aghamolaei T, Tavafian SS, Sabili A. Knowledge of Iranian nurses about  
892 HIV/AIDS: A cross sectional study from Bandar Abbas. *Iran J Clin Infect Dis.* 2010;5(3):161–  
893 5.
- 894 104. M V, MR N, S. V, M R. Knowledge and attitude on HIV/AIDS among adolescent  
895 school children in urban Mysuru, Karnataka, India: a cross sectional study. *Int J Community*  
896 *Med Public Heal [Internet].* 2016;3(5):1224–8. Available from:  
897 <http://ijcmph.com/index.php/ijcmph/article/view/885>
- 898 105. Helen Gonçalves DAG-C. HIV / AIDS transmission knowledge among adolescents  
899 aged 11 years from Southern Brazil. *Rev Bras Epidemiol.* 2013;16(2):420–31.
- 900 106. Othman SM. Knowledge About HIV/AIDS Among High School Students in Erbil  
901 City/Iraq. *Glob J Health Sci [Internet].* 2014;7(1):16–23. Available from:  
902 <http://www.ccsenet.org/journal/index.php/gjhs/article/view/37695>
- 903 107. Hu S, Lai H, Liao P. Comparing Dental Students' Knowledge of and Attitudes Toward  
904 Hepatitis B Virus-, Hepatitis C Virus. *AIDS Patient Care STDS.* 2004;18(10):587–93.
- 905 108. Suominen T, Heikkinen T, Pakarinen M, Sepponen AM, Kylmä J. Knowledge of HIV  
906 infection and other sexually transmitted diseases among men who have sex with men in  
907 Finland. *BMC Infect Dis.* 2017;17(1):1–6.
- 908 109. Wang G, Wada K, Hoshi K, Sasaki N, Ezoe S, Satoh T. Association of Knowledge of  
909 HIV and Other Factors with Individuals' Attitudes toward HIV Infection: A National Cross-  
910 Sectional Survey among the Japanese Non-Medical Working Population. *PLoS One.*  
911 2013;8(7):1–8.
- 912 110. WHO. global report. 2018.
- 913 111. Navaratna S, Kanda K, Dharmaratne SD, Tennakoon S, Jayasinghe A. Awareness and  
914 attitudes towards HIV / AIDS among residents of Kandy , Sri Lanka. *AIDS Care [Internet].*  
915 2014;0(0):1–5. Available from: <http://dx.doi.org/10.1080/09540121.2014.963496>
- 916 112. Janahi EM, Mustafa S, Alsari S, Al-Mannai M, Farhat GN. Public knowledge,  
917 perceptions, and attitudes towards HIV/AIDS in Bahrain: A cross-sectional study. *J Infect Dev*  
918 *Ctries.* 2016;10(9):1003–11.

919 113. Wu CA, Lin SY, So SK, Chang ET. Hepatitis B and Liver Cancer Knowledge and  
 920 Preventive Practices among Asian Americans in the San Francisco Bay Area, California. J  
 921 Cancer Prev. 2007;8(915):127–34.

922 114. von Rosen FT, von Rosen AJ, Müller-Riemenschneider F, Damberg I, Tinnemann P.  
 923 STI knowledge in berlin adolescents. Int J Environ Res Public Health. 2018;15(1).

924 115. Klug SJ, Hukelmann M, Blettner M. Knowledge about infection with human  
 925 papillomavirus: A systematic review. Prev Med (Baltim). 2008;46(2):87–98.

926

927 **Table (S1): PRISMA checklist.**

| Section/topic                      | #  | Checklist item                                                                                                                                                                                                                                                                                              | Reported on page # |
|------------------------------------|----|-------------------------------------------------------------------------------------------------------------------------------------------------------------------------------------------------------------------------------------------------------------------------------------------------------------|--------------------|
| <b>TITLE</b>                       |    |                                                                                                                                                                                                                                                                                                             |                    |
| Title                              | 1  | Identify the report as a systematic review, meta-analysis, or both.                                                                                                                                                                                                                                         | 1                  |
| <b>ABSTRACT</b>                    |    |                                                                                                                                                                                                                                                                                                             |                    |
| Structured summary                 | 2  | Provide a structured summary including, as applicable: background; objectives; data sources; study eligibility criteria, participants, and interventions; study appraisal and synthesis methods; results; limitations; conclusions and implications of key findings; systematic review registration number. | 1                  |
| <b>INTRODUCTION</b>                |    |                                                                                                                                                                                                                                                                                                             |                    |
| Rationale                          | 3  | Describe the rationale for the review in the context of what is already known.                                                                                                                                                                                                                              | 2                  |
| Objectives                         | 4  | Provide an explicit statement of questions being addressed with reference to participants, interventions, comparisons, outcomes, and study design (PICOS).                                                                                                                                                  | 2                  |
| <b>METHODS</b>                     |    |                                                                                                                                                                                                                                                                                                             |                    |
| Protocol and registration          | 5  | Indicate if a review protocol exists, if and where it can be accessed (e.g., Web address), and, if available, provide registration information including registration number.                                                                                                                               | 3                  |
| Eligibility criteria               | 6  | Specify study characteristics (e.g., PICOS, length of follow-up) and report characteristics (e.g., years considered, language, publication status) used as criteria for eligibility, giving rationale.                                                                                                      | 3                  |
| Information sources                | 7  | Describe all information sources (e.g., databases with dates of coverage, contact with study authors to identify additional studies) in the search and date last searched.                                                                                                                                  | 3                  |
| Search                             | 8  | Present full electronic search strategy for at least one database, including any limits used, such that it could be repeated.                                                                                                                                                                               | 3                  |
| Study selection                    | 9  | State the process for selecting studies (i.e., screening, eligibility, included in systematic review, and, if applicable, included in the meta-analysis).                                                                                                                                                   | 4                  |
| Data collection process            | 10 | Describe method of data extraction from reports (e.g., piloted forms, independently, in duplicate) and any processes for obtaining and confirming data from investigators.                                                                                                                                  | 4                  |
| Data items                         | 11 | List and define all variables for which data were sought (e.g., PICOS, funding sources) and any assumptions and simplifications made.                                                                                                                                                                       | 4                  |
| Risk of bias in individual studies | 12 | Describe methods used for assessing risk of bias of individual studies (including specification of whether this was done at the study or outcome level), and how this information is to be used in any data synthesis.                                                                                      | 4                  |

|                               |    |                                                                                                                                                                                                          |    |
|-------------------------------|----|----------------------------------------------------------------------------------------------------------------------------------------------------------------------------------------------------------|----|
| Summary measures              | 13 | State the principal summary measures (e.g., risk ratio, difference in means).                                                                                                                            | 4  |
| Synthesis of results          | 14 | Describe the methods of handling data and combining results of studies, if done, including measures of consistency (e.g., I <sup>2</sup> ) for each meta-analysis.                                       | 5  |
| Risk of bias across studies   | 15 | Specify any assessment of risk of bias that may affect the cumulative evidence (e.g., publication bias, selective reporting within studies).                                                             | 4  |
| Additional analyses           | 16 | Describe methods of additional analyses (e.g., sensitivity or subgroup analyses, meta-regression), if done, indicating which were pre-specified.                                                         | 5  |
| <b>RESULTS</b>                |    |                                                                                                                                                                                                          |    |
| Study selection               | 17 | Give numbers of studies screened, assessed for eligibility, and included in the review, with reasons for exclusions at each stage, ideally with a flow diagram.                                          | 5  |
| Study characteristics         | 18 | For each study, present characteristics for which data were extracted (e.g., study size, PICOS, follow-up period) and provide the citations.                                                             | 6  |
| Risk of bias within studies   | 19 | Present data on risk of bias of each study and, if available, any outcome level assessment (see item 12).                                                                                                | 9  |
| Results of individual studies | 20 | For all outcomes considered (benefits or harms), present, for each study: (a) simple summary data for each intervention group (b) effect estimates and confidence intervals, ideally with a forest plot. | 11 |
| Synthesis of results          | 21 | Present results of each meta-analysis done, including confidence intervals and measures of consistency.                                                                                                  | 11 |
| Risk of bias across studies   | 22 | Present results of any assessment of risk of bias across studies (see Item 15).                                                                                                                          | 8  |
| Additional analysis           | 23 | Give results of additional analyses, if done (e.g., sensitivity or subgroup analyses, meta-regression [see Item 16]).                                                                                    | 11 |
| <b>DISCUSSION</b>             |    |                                                                                                                                                                                                          |    |
| Summary of evidence           | 24 | Summarize the main findings including the strength of evidence for each main outcome; consider their relevance to key groups (e.g., healthcare providers, users, and policy makers).                     | 28 |
| Limitations                   | 25 | Discuss limitations at study and outcome level (e.g., risk of bias), and at review-level (e.g., incomplete retrieval of identified research, reporting bias).                                            | 30 |
| Conclusions                   | 26 | Provide a general interpretation of the results in the context of other evidence, and implications for future research.                                                                                  | 30 |
| <b>FUNDING</b>                |    |                                                                                                                                                                                                          |    |
| Funding                       | 27 | Describe sources of funding for the systematic review and other support (e.g., supply of data); role of funders for the systematic review.                                                               | 30 |

928

929 **Table (S2):** Assessment of quality of included studies.

| Study                            | Was the study obj clear? | Study sample clearly defined | Study pop specified and defined? | Participation rate above 70%? | Sitting and methods rigorous? | Analysis rigorous? | Total score |
|----------------------------------|--------------------------|------------------------------|----------------------------------|-------------------------------|-------------------------------|--------------------|-------------|
| Abdulai <i>et al</i> (12)        | 1                        | 1                            | 1                                | 0                             | 1                             | 1                  | 5           |
| Abimanyi-Ochom <i>et al</i> (13) | 1                        | 1                            | 0                                | 0                             | 1                             | 1                  | 4           |
| Aderemi <i>et al</i> (14)        | 1                        | 1                            | 1                                | 0                             | 1                             | 1                  | 5           |
| Adoba <i>et al</i> (15)          | 1                        | 1                            | 1                                | 0                             | 0                             | 1                  | 4           |
| Ajide and Balogun (16)           | 1                        | 1                            | 1                                | 0                             | 0                             | 1                  | 4           |
| Akokuwebe <i>et al</i> (17)      | 1                        | 1                            | 1                                | 0                             | 0                             | 1                  | 4           |
| Amu and Adegun (18)              | 1                        | 1                            | 1                                | 1                             | 0                             | 1                  | 5           |



|                                  |   |   |   |   |   |   |   |
|----------------------------------|---|---|---|---|---|---|---|
| Appiah-Agyekum <i>et al</i> (19) | 1 | 0 | 1 | 0 | 1 | 1 | 4 |
| Aroke <i>et al</i> (20)          | 1 | 1 | 1 | 0 | 0 | 1 | 4 |
| Asefa and Beyene (21)            | 1 | 1 | 0 | 1 | 1 | 1 | 5 |
| Audet <i>et al</i> (22)          | 1 | 1 | 1 | 0 | 0 | 1 | 4 |
| Azodo <i>et al</i> (23)          | 1 | 1 | 1 | 1 | 0 | 1 | 5 |
| Becker <i>et al</i> (24)         | 1 | 1 | 0 | 0 | 1 | 0 | 3 |
| Carlos <i>et al</i> (25)         | 1 | 1 | 1 | 0 | 0 | 1 | 4 |
| Chan and Tsai (8)                | 1 | 1 | 0 | 1 | 0 | 1 | 4 |
| Chaquisse <i>et al</i> (26)      | 1 | 1 | 0 | 1 | 1 | 1 | 5 |
| Chard <i>et al</i> (27)          | 1 | 1 | 1 | 1 | 0 | 1 | 5 |
| Cheng <i>et al</i> (28)          | 1 | 1 | 1 | 0 | 0 | 1 | 4 |
| Chimoyi <i>et al</i> (29)        | 1 | 0 | 1 | 0 | 0 | 1 | 3 |
| Ciampa <i>et al</i> (30)         | 1 | 1 | 0 | 1 | 1 | 1 | 5 |
| Darteh <i>et al</i> (31)         | 1 | 1 | 0 | 1 | 0 | 1 | 4 |
| Demsiss <i>et al</i> (32)        | - | - | - | - | - | - | - |
| Elbadawi <i>et al</i> (33)       | 1 | 1 | 1 | 1 | 0 | 1 | 5 |
| Engelbrecht <i>et al</i> (34)    | 1 | 1 | 1 | 0 | 0 | 1 | 4 |
| Eni <i>et al</i> (35)            | 1 | 1 | 0 | 0 | 1 | 1 | 4 |
| Ezenwa <i>et al</i> (36)         | 1 | 1 | 1 | 1 | 0 | 1 | 5 |
| Faleye <i>et al</i> (37)         | 1 | 1 | 1 | 1 | 0 | 1 | 5 |
| Faust <i>et al</i> (38)          | 1 | 1 | 0 | 0 | 0 | 1 | 3 |
| Faye <i>et al</i> (39)           | 1 | 1 | 1 | 1 | 1 | 1 | 6 |
| Frambo <i>et al</i> (40)         | 1 | 1 | 0 | 1 | 0 | 1 | 4 |
| Funmilayo <i>et al</i> (41)      | 1 | 1 | 0 | 0 | 0 | 1 | 3 |
| George <i>et al</i> (42)         | 1 | 1 | 0 | 1 | 0 | 0 | 3 |
| Griffith <i>et al</i> (43)       | 1 | 1 | 0 | 1 | 0 | 0 | 3 |
| Joda <i>et al</i> (44)           | 1 | 1 | 0 | 1 | 0 | 0 | 3 |
| Kiderlen <i>et al</i> (45)       | 1 | 1 | 1 | 0 | 0 | 1 | 4 |
| Kufa <i>et al</i> (46)           | 1 | 1 | 0 | 1 | 0 | 1 | 4 |
| Laraqui <i>et al</i> (47)        | 1 | 1 | 1 | 1 | 0 | 1 | 5 |
| Lawan <i>et al</i> (48)          | 1 | 1 | 0 | 0 | 1 | 1 | 4 |
| Makwe <i>et al</i> (49)          | 1 | 1 | 1 | 1 | 0 | 1 | 5 |
| Mason <i>et al</i> (50)          | 1 | 1 | 1 | 0 | 0 | 1 | 4 |
| Massey <i>et al</i> (51)         | 1 | 1 | 1 | 1 | 0 | 1 | 5 |
| Mesfin <i>et al</i> (52)         | 1 | 1 | 1 | 0 | 0 | 1 | 4 |
| Mkumbo <i>et al</i> (53)         | 1 | 1 | 1 | 1 | 0 | 1 | 5 |
| Mouallif <i>et al</i> (54)       | 1 | 1 | 1 | 0 | 0 | 1 | 4 |
| Nabukenya <i>et al</i> (55)      | 1 | 1 | 0 | 1 | 0 | 1 | 4 |
| Nawagi <i>etal</i> (56)          | 1 | 1 | 1 | 0 | 0 | 1 | 4 |
| Ngaira <i>et al</i> (57)         | 1 | 1 | 1 | 0 | 1 | 0 | 4 |
| Noubiap <i>et al</i> (58)        | 1 | 1 | 1 | 0 | 1 | 0 | 4 |
| Nubed <i>et al</i> (59)          | 1 | 1 | 0 | 1 | 0 | 1 | 4 |
| Ojieabu <i>et al</i> (60)        | 1 | 1 | 1 | 1 | 0 | 1 | 5 |

|                                |   |   |   |   |   |   |   |
|--------------------------------|---|---|---|---|---|---|---|
| Okonkwo <i>et al</i> (61)      | 1 | 1 | 0 | 1 | 0 | 0 | 3 |
| Okonkwo <i>et al</i> (62)      | 1 | 1 | 1 | 1 | 1 | 1 | 6 |
| Oladepo <i>and</i> Fayemi (63) | 1 | 1 | 1 | 0 | 1 | 0 | 4 |
| Omotowo <i>et al</i> (64)      | 1 | 1 | 1 | 1 | 1 | 1 | 6 |
| Oppong and Oti-Boadi (65)      | 1 | 1 | 1 | 0 | 0 | 0 | 3 |
| Owusu (66)                     | 1 | 0 | 1 | 0 | 0 | 1 | 3 |
| Oyekale (67)                   | 1 | 1 | 0 | 0 | 1 | 1 | 4 |
| Paintsil <i>et al</i> (68)     | 1 | 1 | 1 | 0 | 0 | 1 | 4 |
| Pathmanathan <i>et al</i> (69) | 1 | 1 | 0 | 0 | 0 | 1 | 3 |
| Poole <i>et al</i> (70)        | 1 | 1 | 1 | 0 | 1 | 1 | 5 |
| Reuter <i>et al</i> (71)       | 1 | 0 | 1 | 0 | 1 | 1 | 4 |
| Rukundo <i>et al</i> (72)      | 1 | 1 | 0 | 0 | 1 | 1 | 4 |
| Sahile <i>et al</i> (73)       | 1 | 1 | 1 | 1 | 0 | 1 | 5 |
| Saleh <i>et al</i> (74)        | 1 | 1 | 0 | 0 | 1 | 1 | 4 |
| Sandqvist <i>et al</i> (75)    | 1 | 1 | 1 | 0 | 1 | 0 | 4 |
| Schwitters <i>et al</i> (76)   | 1 | 1 | 1 | 0 | 1 | 1 | 5 |
| Seyoum and Legesse (77)        | 1 | 1 | 1 | 0 | 1 | 1 | 5 |
| Shiferaw <i>et al</i> (78)     | 1 | 1 | 1 | 0 | 0 | 1 | 4 |
| Sultan <i>et al</i> (79)       | 1 | 1 | 1 | 0 | 0 | 1 | 4 |
| Tarekegne <i>et al</i> (80)    | 1 | 1 | 1 | 1 | 1 | 1 | 6 |
| Umar and Oche (81)             | 1 | 1 | 1 | 1 | 0 | 1 | 5 |
| Wagenaar <i>et al</i> (82)     | 1 | 0 | 1 | 0 | 0 | 1 | 3 |
| Yaya <i>et al</i> (83)         | 1 | 1 | 0 | 1 | 1 | 1 | 5 |
| Zungu <i>et al</i> (84)        | 1 | 1 | 1 | 0 | 1 | 1 | 5 |

930

931

932

933 **Table (S3):** Characteristics of HIV-related included studies conducted among Nigerians.

| Study                       | Year of publication | Year/s of conduction | City/Region              | study population/s   | sample size | Gender  | Participants' Age |
|-----------------------------|---------------------|----------------------|--------------------------|----------------------|-------------|---------|-------------------|
| Aderemi <i>et al</i> (14)   | 2013                | After 2010           | Oyo State                | Students             | 600         | Both    | 12-19             |
| Ajide and Balogun (16)      | 2018                | After 2010           | Ibadan/Oyo State         | Students             | 240         | Both    | 16±1              |
| Akokuwebe <i>et al</i> (17) | 2016                | After 2010           | Ikeji-Arakeji/Osun State | Adolescents          | 341         | Both    | 16+-2             |
| Amu and Adegun (18)         | 2015                | After 2010           | Ekiti State              | Students             | 540         | Both    | Oct-14            |
| Azodo <i>et al</i> (23)     | 2014                | 2010                 | Enugu State              | Dental tech students | 198         | Both    | 20- ≥27           |
| Faust <i>et al</i> (38)     | 2017                | 2013                 | Nigeria                  | general population   | 56 307      | Both    | 15-49             |
| Lawan <i>et al</i> (48)     | 2012                | 2011                 | KanoState                | FSW                  | 124         | Females | 26±2              |
| Ojieabu <i>et al</i> (60)   | 2011                | 2011                 | Sagamu/Ogun State        | Pregnant Women       | 403         | Females | 20- ≥40           |
| Oladepo and Fayemi (63)     | 2011                | 2010                 | Ibadan/Oyo State         | Secondary students   | 420         | Both    | 10-19             |
| Umar and Oche (81)          | 2012                | 2010                 | Sokoto State             | religious leaders    | 158         | Male    | ≥30               |

|                        |      |      |         |                          |        |         |       |
|------------------------|------|------|---------|--------------------------|--------|---------|-------|
| Yaya <i>et al</i> (83) | 2018 | 2013 | Nigeria | community dwelling women | 38 948 | Females | 15-49 |
|------------------------|------|------|---------|--------------------------|--------|---------|-------|

934

935

936 **Table (S4):** Characteristics of HIV-related included studies conducted among South Africans.

| Study                         | Year of publication | Year/s of conduction | City/Region                                                 | study population/s                            | sample size | Gender | Participants' Age |
|-------------------------------|---------------------|----------------------|-------------------------------------------------------------|-----------------------------------------------|-------------|--------|-------------------|
| Becker <i>et al</i> (24)      | 2015                | 2009-2010            | Durban/KwaZulu-Natal                                        | General population                            | 2,477       | Both   | N.A               |
| Chard <i>et al</i> (27)       | 2017                | After 2010           | South Africa                                                | men who indicated an interest in men          | 386         | Male   | mean 33           |
| Chimoyi <i>et al</i> (29)     | 2015                | 2013                 | Johannesburg/Gauteng                                        | General population                            | 1,146       | Both   | N.A               |
| Engelbrecht <i>et al</i> (34) | 2017                | 2012                 | Moretele Sub-district/Bojanala District/North West province | home-based carers                             | 144         | Both   | median 35         |
| Faleyee <i>et al</i> (37)     | 2014                | 2012-2013            | Durban/KwaZulu-Natal/South africa                           | Male medical circumcision clients             | 394         | Male   | mean 28±9         |
| George <i>et al</i> (42)      | 2013                | 2010                 | Northern Cape province                                      | rural based traditional healers               | 186         | Both   | N.A               |
| Kufa <i>et al</i> (46)        | 2018                | After 2010           | Eastern Cape,Western Cape,Free State,Gauteng State          | STI service attendees                         | 1,054       | Both   | 23-32             |
| Wagenaar <i>et al</i> (82)    | 2012                | 2010                 | South Africa                                                | Men Who Have Sex with Men                     | 1,593       | Male   | ≥18               |
| Zungu <i>et al</i> (84)       | 2016                | 2012                 | South Africa                                                | medically and traditionally circumcised males | 11,086      | Male   | ≥15               |

937

938

939 **Table (S5):** Characteristics of HIV-related included studies conducted among adolescent  
940 Africans.

|                                  | Year of publication | Year/s of conduction | City/Region/Country                                 | Study population/s               | Sample size | Gender | Participants' Age |
|----------------------------------|---------------------|----------------------|-----------------------------------------------------|----------------------------------|-------------|--------|-------------------|
| Aderemi <i>et al</i> (14)        | 2013                | After 2010           | Oyo State/Nigeria                                   | Students                         | 600         | Both   | 12-19             |
| Ajide and Balogun (16)           | 2018                | After 2010           | Ibadan/Nigeria                                      | Students                         | 240         | Both   | 16±1              |
| Akokuwebe <i>et al</i> (17)      | 2016                | After 2010           | Ikeji-Arakeji/Osun/Nigeria                          | Adolescents                      | 341         | Both   | 16+2              |
| Amu and Adegun (18)              | 2015                | After 2010           | Ado Ekiti/Nigeria                                   | Students                         | 540         | Both   | 10-14             |
| Appiah-Agyekum <i>et al</i> (19) | 2013                | After 2010           | Accra/Ghana                                         | Students                         | 260         | Female | 16- ≥19           |
| Chaquisse <i>et al</i> (26)      | 2018                | 2013-2014            | Nampula/Mozambique                                  | Pregnant women                   | 1,186       | Female | median 22         |
| Chiampapa <i>et al</i> (30)      | 2012                | 2011                 | Zambezia/Mozambique                                 | prenatal care in women           | 348         | Female | median 24         |
| Darteh <i>et al</i> (31)         | 2016                | 2011                 | Kwesimintsim Zongo/Ghana                            | adolescents, general population  | 902         | Both   | mean 14           |
| Nubed <i>et al</i> (59)          | 2016                | 2014                 | Fako/South West Region/Cameroon                     | senior secondary school students | 464         | Both   | 13-25             |
| Oladejo and Fayemi (63)          | 2011                | 2010                 | Ibadan South-West Local Government Area/Oyo/Nigeria | secondary students               | 420         | Both   | 10-19             |

|                           |      |            |                                     |                         |     |                  |       |
|---------------------------|------|------------|-------------------------------------|-------------------------|-----|------------------|-------|
|                           |      |            |                                     |                         |     | h                |       |
| Dwusu <i>et al</i> (66)   | 2015 | After 2010 | Cape Coast Metropolis/Ghana         | primary school children | 120 | B<br>o<br>t<br>h | 9-13  |
| Reuter <i>et al</i> (71)  | 2018 | 2013       | Antsiranana/Madagascar              | university students     | 242 | B<br>o<br>t<br>h | 23±3  |
| Rukundo <i>et al</i> (72) | 2016 | 2014       | Kampala and Buikwe districts/Uganda | school students         | 245 | B<br>o<br>t<br>h | 10-19 |

941

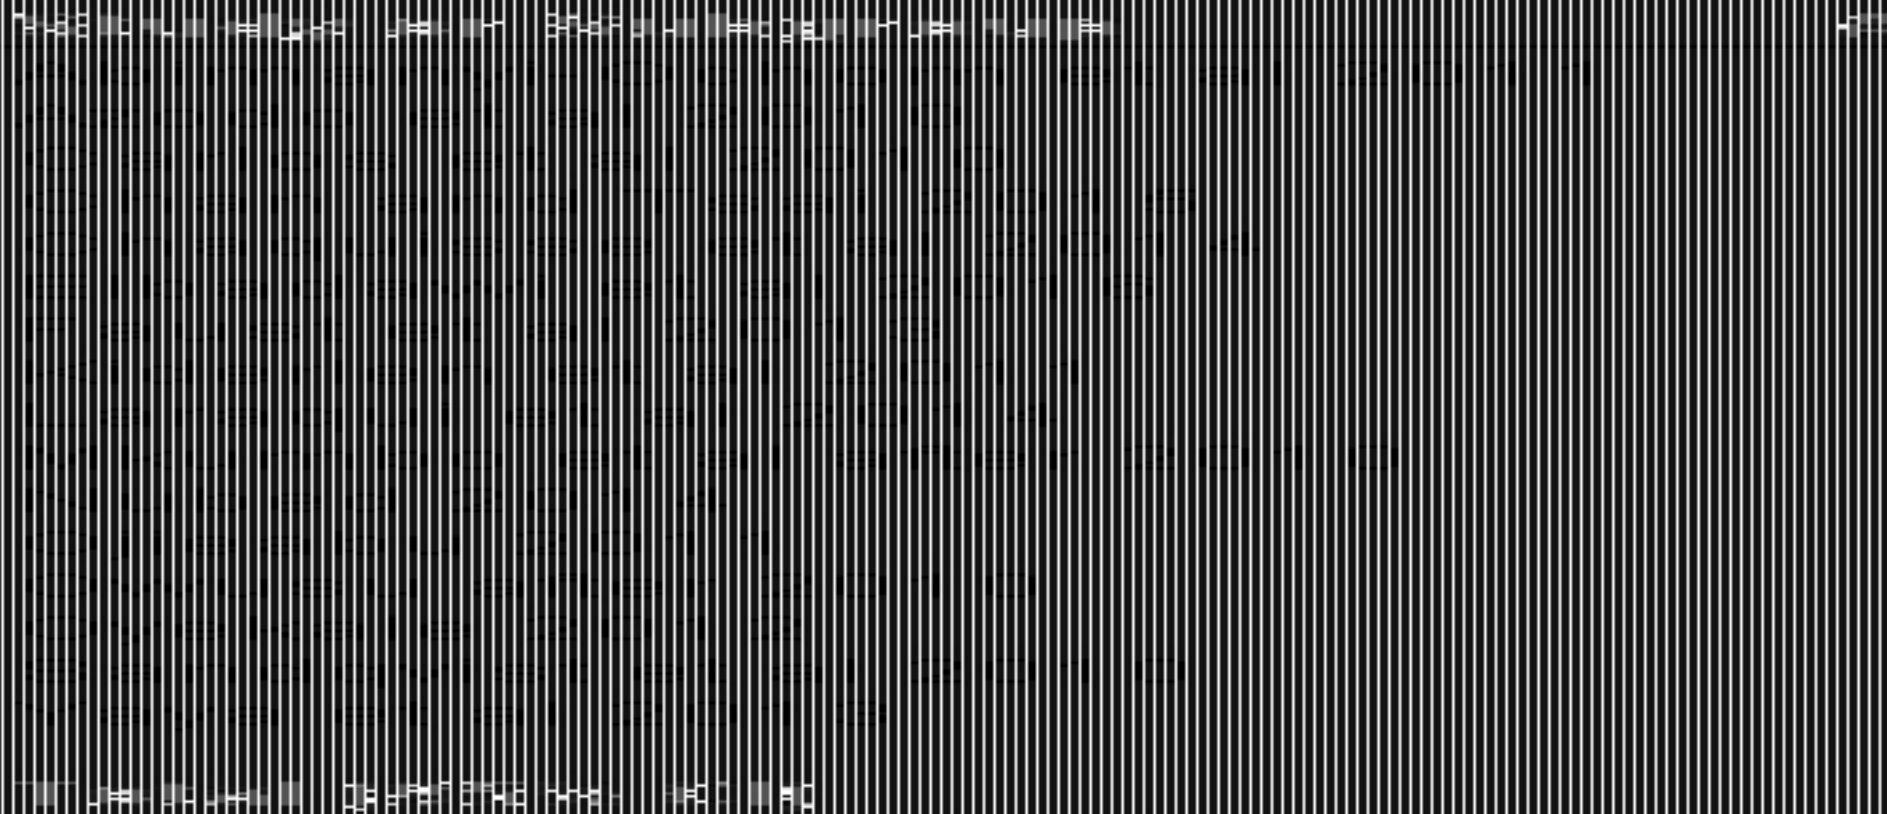

Fig (2)

Included

Eligibility

Screening

Identification

Re  
th

bioRxiv preprint doi: <https://doi.org/10.1101/557389>; this version posted February 21, 2019. The copyright holder for this preprint (which was not certified by peer review) is the author/funder, who has granted bioRxiv a license to display the preprint in perpetuity. It is made available under aCC-BY 4.0 International license.

Fig (1)
